# Supplementary material
Source: Research Square preprint supplement (doi:10.21203/rs.3.rs-9182434/v1)
Supplement: Supplementary file 1 [file 7b11f5ab7f35c5d4e1cf8d3d.pdf]

## Supplemental Information

### **AI-guided Autonomous Workflows Accelerate Kinetic Analysis of Polymer Depolymerization**

Nicholas J. Galan,<sup>1</sup> Britney Baez,<sup>1</sup> Ju-An Kim,<sup>1</sup> Beibei Yao,<sup>1</sup> Nduka Ogbonna,<sup>1</sup> Isaiah Dishner,<sup>1</sup>  
Jared Bowman,<sup>1</sup> Jesse McGaha,<sup>2</sup> Ankit Shrivastava,<sup>2</sup> Stephen DeWitt,<sup>2</sup> Sheng Dai<sup>1</sup>, Craig  
Bridges,<sup>1</sup> Jeffrey C. Foster,<sup>1</sup> Tomonori Saito<sup>1</sup>

<sup>1</sup>Chemical Sciences Division, Oak Ridge National Laboratory, Oak Ridge, TN 37831, United States

<sup>2</sup>Computing and Computational Sciences Division, Oak Ridge National Laboratory, Oak Ridge, TN 37831, United States

## Supplemental Discussion

**SD1, Depolymerization System Design:** To develop our automated deconstruction workflow, we investigated poly(bisphenol A carbonate) (PC) as a model polymer for depolymerization due to its abundance in post-consumer waste streams and solubility in common organic solvents (e.g., CHCl<sub>3</sub>, THF, DCM, etc.), enabling homogeneous reaction monitoring, which is critical for accurate kinetic profiling. Homogeneous PC depolymerization reactions were carried out via glycolysis using the sterically hindered organic superbase 7-methyl-1,5,7-triazabicyclo(4.4.0)dec-5-ene (mTBD) to facilitate reasonable reaction times compared to its unsubstituted counterpart.<sup>1</sup> Acetic acid (AcOH) was found to be an effective quenching agent, significantly impeding the depolymerization for up to 24 hours. We selected the ChemSpeed Swing XL system as our autonomous assistant due to its versatile capabilities such as precision liquid transfer, modularity in workflow design, and capacity to execute numerous reactions in parallel, all of which are amenable for in-depth depolymerization kinetic experiments.

**SD2, Selection of Kinetic Data Included in Manuscript:** Over the course of this study, a total of 26 automated kinetic runs were conducted, producing 21 samples from each run. In total, 546 individual samples were generated and analyzed. Because many of these kinetic runs were used for process optimization or to aid in the development of various workflow components (e.g., batch processing) and were redundant with respect to initial reaction conditions, these runs are excluded from the subset of the data included in the manuscript (7 automated runs and 147 samples + 3 additional AI-guided runs and 24 samples).

**SD3, ORNL INTERSECT Overview:** An INTERSECT service was created for the lab for experimentation. The lab service was configured to output data to intermediate storage, report relevant outputs, and receive control inputs. The host file system is monitored for the creation of relevant metadata. On observation of relevant metadata, that metadata is uploaded to intermediate storage hosted in the ORNL Research Cloud. The intermediate storage is monitored for the upload of relevant analysis data. On observation of relevant analysis data, the lab service emits an event to notify other systems of the upload. On receiving a control message, the service writes a control file to the host system that triggers a new experiment operation. An INTERSECT client was created to await events from the lab service, configure and provide data to the learning service, and provide

returned commands to the lab service. On observation of a lab event, the client retrieves data from intermediate storage and loads it for operations. Observed data is configured and sent to the learning service which responds with the next configuration for analysis. On observation of analysis configuration, the client creates a control string that is sent to the lab service for configuration.

**SD4, Kinetic Model Considerations:** The Stagg relationship assumes pseudo-first order kinetics with respect to the concentration of bonds in the polymer sample and a Kuhn distribution of polymer chains (i.e.,  $D = 2$ ) across the duration of the depolymerization reaction and allows interrogation of depolymerization rates from simple MW vs time datasets. We used  $M_w$  data to calculate  $k_{app}$  to mitigate variability we observed in measuring  $M_n$  values arising from calibration drift or when comparing data from different SEC instruments. Specifically, we found  $M_n$  to be highly sensitive to the concentration of monomers and other lower oligomers that form during depolymerization, species that are difficult to quantify by SEC. While we acknowledge the assumption of a Kuhn distribution across the complete depolymerization timescale is likely an oversimplification, we point out that calculation of  $k_{app}$  values from  $M_w$  data enables more accurate and reproducible *relative* comparisons of reaction rates under different initial experimental conditions.

## Supplemental Methods & Procedures

### Supplemental Methods:

*Size-Exclusion Chromatography.* Size exclusion chromatography (SEC) analysis was performed using a Tosoh EcoSEC Elite system equipped with two Tosoh TSKgel Super AWM-H columns (15 cm x 6 mm ID, 9  $\mu$ m pore size), and integrated differential refractive index (RI) detector, and a Tosoh Lens3 MALS detector operating at three angles (10  $^\circ$ , 90  $^\circ$ , and 170  $^\circ$ ). The mobile phase used was THF (HPLC grade) at a flow rate of 0.3 mL min<sup>-1</sup>. SEC analysis was also performed on an Agilent 1260 infinity II LC system equipped with 3 PolyPore (250 x 4.6 mm) columns in series and a PolyPore (50 x 4.6 mm) guard column. Detection was conducted using the integrated multi-

detector suite consisting of a differential RI detector, a multi-angle light scattering detector operating at two angles (15 ° and 90 °), and a differential viscometer. The mobile phase used was THF (HPLC grade) at a flow rate of 0.3 mL min<sup>-1</sup>.

*NMR spectroscopy.* <sup>1</sup>H and <sup>13</sup>C NMR spectroscopy were recorded on a Bruker Ascend Evo 400 spectrometer operating at 400 MHz equipped with a SampleCase autosampler carousel. Chemical shifts are reported in parts per million (ppm) relative to residual protonated solvent for <sup>1</sup>H (CHCl<sub>3</sub>, δ = 7.26) and relative to carbon resonances of the solvent for <sup>13</sup>C (CDCl<sub>3</sub>, δ = 77.16).

*Thermogravimetric Analysis.* Thermogravimetric analysis (TGA) of the various polymer samples was acquired on a TA Instruments TGA 55 and were heated up to 600 °C at a rate of 10 °C/min under N<sub>2</sub> atmosphere.

*Differential Scanning Calorimetry.* Thermal transitions were determined for the various polymer samples (1-15 mg in Tzero pans) using a TA Instruments Discovery Series DSC 250 by heating the sample from 0 °C to 160 °C at a heating and cooling rate of 25 °C/min (for polycarbonate oligomers) or from -90 °C to 200 °C at a heating and cooling rate of 10 °C/min (for polyurethane samples) under N<sub>2</sub> atmosphere over 3 consecutive heating and cooling cycles. The glass transition (*T<sub>g</sub>*) was taken as the inflection point in the DSC trace of the 2nd heating cycle.

*Tensile Measurements.* Solutions for polymer solvent casting were prepared by dissolving the appropriate polymer in CHCl<sub>3</sub> (12-15 wt% of polymer). The polymer solution was then passed through a small plug of glass wool and cast into a Teflon dish, covered with perforated aluminum foil, and left to evaporate at room temperature. The cast sample was then dried further in a vacuum oven at 60 °C for at least 6 h. The resulting polymer film was delaminated from the Teflon dish and small portions of the edges were analyzed via TGA to confirm the absence of residual solvent. Dogbone samples for tensile measurements were prepared from these films by punching with a mini dogbone die. The width, length and thickness of these films was measured using a caliper and tensile strength was measured on an Instron machine (Instron 3343 Single Column Testing System). ASTM D1708 standard with a stretching rate of 1.00 mm/s was used for all measurements.

*Dynamic Mechanical Analysis.* Dynamic mechanical analysis (DMA) was carried out by a TA Instruments DMA 850 using a tension clamp. Polymer film samples were prepared following the

same methodology for tensile measurements and cut into a rectangular shape. Samples were tested in a temperature range from -100 °C to 150 °C at a rate of 3.0 °C/min with a frequency of 1.0 Hz and 15.0  $\mu\text{m}$  amplitude.

*Automated Analysis of SEC Data.* We developed an object-oriented approach to automate the analysis of batches of SEC data using Python. Our core methods are encapsulated within a base Chromatograph object, which provides functions for baseline correction, peak identification, and peak integration. Chromatograph takes as input raw chromatographic data for both the sample and a ‘blank’ and an analysis window specifying the region (in time or volume) within the data where the signals of interest are expected and provides detected peak parameters as outputs including location, height, full width at half maximum (FWHM), and area. The core algorithmic steps are shown in Figure S1 and are discussed in detail below.

1. **Estimation and correction for a variable baseline.** Raw chromatography data is first subjected to baseline correction using the rolling standard deviation distribution according to a method developed by Wang et al.<sup>2</sup> and implemented within the `pybaselines` package in Python. A blank trace is then subtracted, if provided, to suppress nascent baseline artifacts systemic to all analyzed samples. Finally, negative peaks are zeroed to improve peak identification and fitting performance. Our processing assumes that analyte signals exhibit positive reactive index responses.
2. **Peak identification.** Analyte peaks are identified in the baseline-processed data via comparison of local maxima to neighboring values. Comparisons are made based on the prominence of each peak as defined by the vertical distance between the peak maximum and its lowest contour line. In brief, a horizontal line is extended from the peak maximum until it reaches the data window or intersects with adjacent signal. The minima between the peak maximum and these intersection points define the peak bases, the highest of which is assigned as the lowest contour line. Prominence-based peak finding is implemented in the SciPy API for Python and is used by Chromatograph.
3. **Peak fitting and convolution.** For an assigned data window with  $N$  peaks, Chromatograph fits a convolution of  $N$  amplitude-weighted skew normal distributions to the baseline-corrected signal:

$$S(t) = \frac{A}{\sigma\sqrt{2\pi}} \exp\left[-\frac{(t-\tau)^2}{2\sigma^2}\right] \left[1 + \operatorname{erf}\left(\frac{\alpha(t-\tau)}{\sigma\sqrt{2}}\right)\right] \quad (\text{S1})$$

where  $A$  is the amplitude of the peak,  $t$  is the specific time (or volume) point,  $\tau$  is the peak center,  $\sigma$  is the spread of the peak, and  $\alpha$  is the peak skewness. Optimization of the peak fitting values is conducted using least squares minimization implemented in the SciPy API. Chromatograph stores internally the isolated fits for each identified peak, the convolved fit, and the best fit values for each above parameter.

4. **Calculation of distribution averages.** Molecular weight distribution averages for polymer samples are then calculated from the processed Chromatograph via the SEC\_Chromatograph sub-object, which supplies functions to convert raw time (or volume) data into molecular weight values using a third-order polynomial of the form

$$M(t) = a_3 t^3 + a_2 t^2 + a_1 t + a_0 \quad (\text{S2})$$

where  $a_3$ ,  $a_2$ ,  $a_1$ , and  $a_0$  are instrument-specific coefficients obtained via SEC calibration with narrow polymethylmethacrylate (PMMA) standards. Number average molecular weight,  $M_n$ , weight average molecular weight,  $M_w$ , and dispersity,  $\mathcal{D}$ , are calculated from infinitesimally small slices of the convoluted fit as follows

$$M_n = \frac{\sum_i S(t)_i}{\sum_i \frac{S(t)_i}{M(t)_i}} \quad (\text{S3})$$

$$M_w = \frac{\sum_i S(t)_i M(t)_i}{\sum_i S(t)_i} \quad (\text{S4})$$

$$\mathcal{D} = \frac{M_w}{M_n} \quad (\text{S5})$$

5. **Histogram output.** SEC\_Chromatograph converts one or more of the fitted curves into a histogram to visualize the molecular weight distribution and to provide an input for kinetic Monte Carlo (kMC) simulations (*vide infra*). First, the total concentration of chains is calculated as the denominator of Eq. S3. A specified scaling factor is then applied to approximately target the desired number of chains in the population. The results are output

in the form of a DataFrame containing the average degree of polymerization for each distribution slice,  $X_{n,i}$ , and the number of chains of  $X_{n,i}$  as columns.

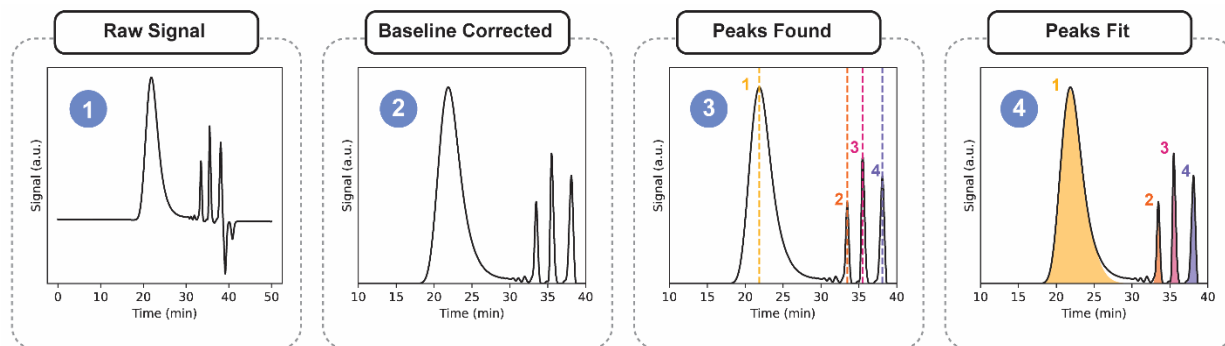

**Figure S1.** Baseline correction, peak identification, and peak fitting algorithms implemented in Chromatograph as applied to real SEC data. Shown from left to right are: (1) the raw data trace obtained from the SEC instrument; (2) the data after baseline correction; (3) the peaks identified in the signal; and (4) the individual fits of the identified peaks.

*INTERSECT Cloud-Computing.* A service for intermediate storage of data was hosted within the ORNL Research Cloud.

*Kinetic Monte Carlo Simulations.* To extract mechanistic information from depolymerization kinetics, the depolymerizations are modeled as an ensemble of elementary reactions. We neglect solvent effects (i.e., we assume that all components are fully soluble), changes in solution viscosity (i.e., we assume dilute monomer and polymer concentrations, approximately at or below 1 M), and changes in temperature (i.e., we assume that temperature is constant throughout the reaction duration). Rate equations are expressed in pseudo-first order fashion with respect to polymer chains, assuming that changes in nucleophile and catalyst concentration are negligible. Simulations are performed in a unit system where rate constants for bond scission are on the order of 1.<sup>3</sup> This allows for the system of reactions for polymer chain scission to be described by a single input parameter  $r = \frac{k_{rand}}{k_{end}}$  that describes the relative rate constants of random and chain-end scission ( $k_{rand}$  and  $k_{end}$ , respectively) and drastically simplifies, and increases the accuracy of, the fitting of experimental data. The molecular weight dependencies of these rate constants are not considered; however, as we note in the main text, this is likely an oversimplification to be addressed in future simulation implementations.

Simulation sizes are restricted to an upper bound of  $N_{chains}$  (typically  $10^2 - 10^3$ ) to limit calculation costs. For each simulation, an initial population of chains is ‘synthesized’ from real experimental data by downsampling of a  $X_n$  frequency histogram generated from our automated data analysis routine (*vide supra*). An example is provided in Figure S2. The overall depolymerization conversion,  $p$ , is calculated by tracking the change in the total number of bonds

$$p = 1 - \frac{B}{B_0} \quad (S6)$$

where  $B$  and  $B_0$  represent the instantaneous and initial number of bonds, respectively. At various intervals of  $p$ , molecular weight distribution averages are calculated for the population of chains and stored for later analysis. Simulations are terminated when the specified target  $p$  is achieved.

1. **Choosing a reaction.** The kMC simulation is based on an algorithm developed by Gillespie where discrete reaction events are stochastically sampled.<sup>4</sup> The probability of a reaction  $j$  occurring at a given instant is given by

$$p_j = \frac{R_j}{\sum_j R_j} \quad (S6)$$

where  $R_j$  is the rate of reaction  $j$ . At each simulation step, a reaction is selected by sampling all reaction probabilities. A random number,  $\alpha$ , uniformly distributed between 0-1 is generated and compared against the cumulative reaction probabilities such that

$$\sum_j^{\mu-1} p_j < \alpha < \sum_j^{\mu} p_j \quad (S7)$$

where  $\mu$  is the index of the selected reaction. The selected reaction is executed as described in the sections below, after which reaction probabilities are recalculated based on the outcome of the reaction and used for the subsequent simulation step.

2. **Random chain scission.** For this type of reaction, the overall number (concentration) of bonds is used as an input. A bond is selected at random from the population, and the outcome of breaking this bond is evaluated, generating two new chains of length  $L_1 = L_0 -$

$x$  and  $L_2 = x - 1$ , where  $L_1$  and  $L_2$  represent the lengths of the new chains in terms of the number of bonds,  $L_0$  is the number of bonds initially present in the selected chain, and  $x$  is a random bond location. The probability of a random scission event is calculated from the stipulated rate expression

$$Rate = k_{rand}[B] \quad (S8)$$

where  $k_{rand}$  is the rate constant for random chain scission and  $[B]$  is the instantaneous concentration of bonds.

3. **Chain end scission.** For this type of reaction, the overall number (concentration) of polymer chain ends is used as an input. A bond located at a chain end is selected randomly from the population, and the outcome of breaking this bond is evaluated, generating one monomer ( $L_1 = 0$ ) and one chain of length  $L_2 = L_0 - 1$ . The probability of a chain end scission event is calculated from the stipulated rate expression

$$Rate = k_{end}[B_e] \quad (S9)$$

where  $k_{end}$  is the rate constant for chain end scission and  $[B_e]$  is the instantaneous concentration of bonds located at polymer chain ends.

4. **Calculation of molecular weight distribution averages.** Molecular weight distribution averages are calculated from the population of chains at various conversion intervals using the standard equations (and Eq. S5 above)

$$M_n = \frac{\sum M_i N_i}{\sum N_i} \quad (S10)$$

$$M_w = \frac{\sum M_i^2 N_i}{\sum M_i N_i} \quad (S11)$$

where  $N_i$  is the number of chains of mass  $M_i$ , calculated as  $M_i = M_0(B_i + 1)$  with  $M_0$  being the mass of the polymer repeat unit (specified as an input to the simulation) and  $B_i$  the number of bonds in chain  $i$ .

5. **Simulation implementation.** Algorithms for kMC simulations are implemented within a `PolymerSample` object in Python. The object is initiated by passing the polymer's repeat unit molecular weight as a parameter. The population of polymer chains used for the simulation is generated from a  $X_n$  frequency histogram using `build_from_list()` where the frequency array and the desired simulation size, in terms of the number of chains, are passed as arguments (Figure S3). Calling `PolymerSample.depolymerize()` with a stipulated target  $p$  and input reaction rate constant ratio  $r$  executes the simulation and returns an `np.array` containing information about the conversion-dependent changes in molecular weight distribution averages. To fit experimental data, multiple simulations are run, varying the input  $r$ , until a minimum mean squared error value was obtained.

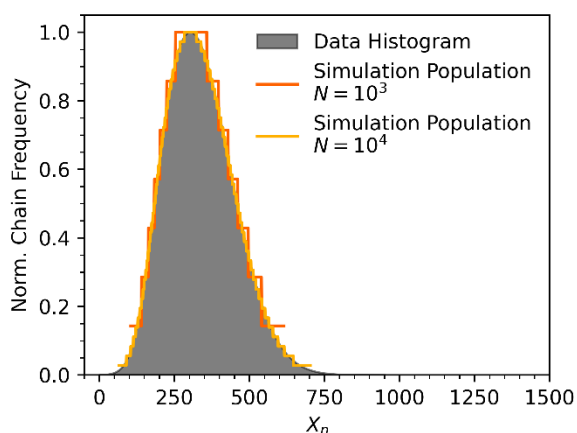

**Figure S2.** Comparison of chain population histogram, generated from experimental data and passed to `PolymerSample` as an argument, against the initial population of chains generated by the simulation as a function of  $N$ .

6. **Simulation benchmarking, accuracy, and precision.** Simulations are run with different  $N$  to determine the optimal simulation size in terms of computational cost, accuracy, and precision. Five replicates are run for each  $N$ , targeting low overall  $p = 0.05$  where the variability in simulation outcomes is found to be highest. As shown in Figure S3,  $N = 10^3$  is sufficient to minimize the number of reaction cycles needed to complete the simulation, maximize the simulation accuracy as determined by comparison to the expected value (from theory, *vide infra*), and maximize precision as judged by the reduction in variance between replicates.

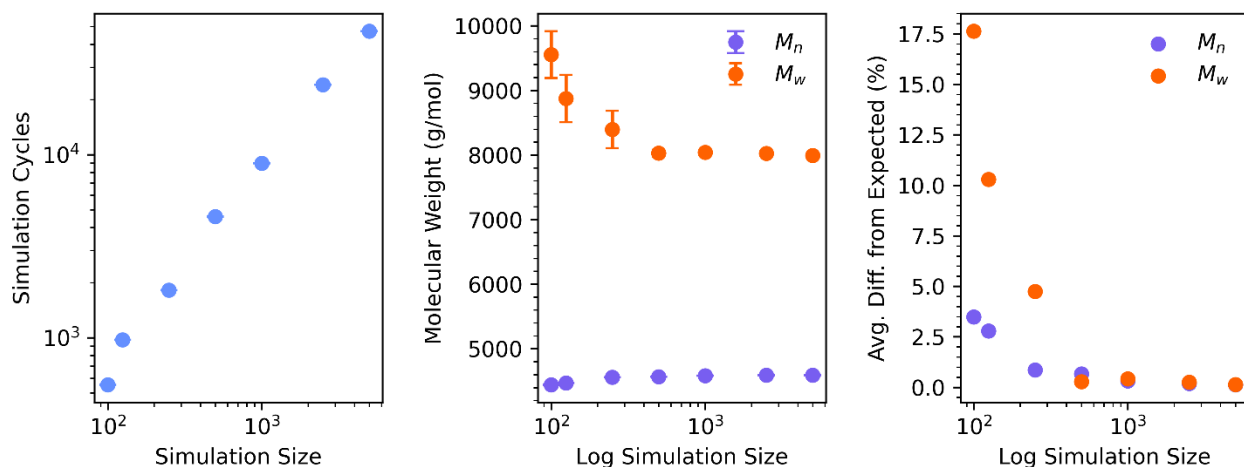

**Figure S3.** (Left) Average number of simulation cycles required to reach target  $p = 0.05$  as a function of simulation size,  $N$ . (Middle) Simulated  $M_n$  and  $M_w$  as a function of  $N$ . The error bars represent the standard deviation of the average values across  $n = 5$  replicates. (Right) Average percentage difference in simulated molecular weight and expected molecular weight as a function of  $N$ . The expected molecular weight values were calculated using Eqs. S16 and S17.

*Model Calibration and Evaluation.* Observed and simulated datasets were analyzed by estimating model parameters through a nonlinear least-squares (NLLS) optimization using the `leastsq` function from the `scipy.optimize` module. In cases where the model was fixed and required no parameter estimation, goodness-of-fit was evaluated by calculating the coefficient of determination ( $R^2$ ) and the mean squared error (MSE) directly from the residuals.

*Statistical Assessment of Precision.* The intra-experiment precision for both automated and manual kinetic experiments was evaluated by calculating the percent coefficient of variation (%CV) from  $n = 3$  technical replicates per time point. A Welch's t-test was used to compare the **mean** %CV of manual and automated depolymerization reactions ( $n = 21$  per group) to evaluate differences in measurement precision ( $\alpha = 0.05$ ). To satisfy the assumption of normality, %CV values were log-transformed prior to analysis.

*Statistical Comparison of Regression Slopes.* The homogeneity of regression slopes across datasets was evaluated by testing the interaction effect between the categorical dataset indicator and the continuous covariate (time) via analysis of covariance (ANCOVA). A statistically

significant interaction indicated heterogeneous slopes, signifying that the relationship between time and the dependent variable differed between groups.

### Supplemental Procedures:

**Table S1.** Summary of kinetic experiments included in this work.

| Run | Automated? | [EG] (M) | [mTBD] (M) |
|-----|------------|----------|------------|
| 1   | Yes        | 0.29     | 0.0049     |
| 2   | Yes        | 0.29     | 0.0049     |
| 3   | Yes        | 0.29     | 0.0049     |
| 4   | No         | 0.29     | 0.0049     |
| 5   | No         | 0.29     | 0.0049     |
| 6   | No         | 0.29     | 0.0049     |
| 7   | Yes        | 0.29     | 0.00098    |
| 8   | Yes        | 0.29     | 0.0098     |
| 9   | Yes        | 0.193    | 0.0049     |
| 10  | Yes        | 0.384    | 0.0049     |

\*PC concentration was fixed at 0.097 M with respect to repeat units for all experiments and the temperature was held at 25 °C.

*Representative Manual PC Depolymerization.* To a 100 mL round-bottom flask equipped with a stir bar, 84 mL of THF were added. The flask was submerged in an oil bath heated to 40 °C and then 2.1 g (8.26 mmol) of PC pieces were added slowly over the course of approximately 5 hours. During this time, twenty two-dram vials were charged with 0.5 mL of a solution of AcOH (8.58 mmol) in THF (0.4 M). Upon complete dissolution, the PC stock solution was allowed to cool to room temperature. EG (1.39 mL; 24.8 mmol) was then added dropwise with vigorous stirring. An initial to aliquot (4.0 mL) was collected from the stock solution and added to a 2-dram vial in the absence of AcOH. Catalytic mTBD (56.5  $\mu$ L; 0.393 mmol) was then rapidly injected into the PC:EG solution and a stopwatch was started. A 3.5 mL aliquot of the reaction mixture was collected and immediately quenched by addition to one of the 2-dram vials charged with AcOH at each of the following time points (in min): 3, 6, 9, 12, 15, 18, 21, 24, 27, 30, 40, 50, 60, 70, 80, 90, 100, 110, 120, 150.

*Polyurethane Synthesis and Film Casting.* To separate oven-dried 20 mL scintillation vials equipped with stir bars, poly(carbonate) BPA (PC) (0.254 mmol) and hydroxy-terminated hydrogenated polybutadiene (PBD) (0.254 mmol) were added. The vials were transferred into an

N<sub>2</sub> filled glovebox and anhydrous THF was added to each (4 mL to dissolve PC, and 12 mL to dissolve PBD). In a separate oven-dried 20 mL scintillation vial, dibutyltin dilaurate (DBTDL; 3.0 uL, 0.00508 mmol) and hexamethylenediisocyanate (HDI; 83 uL, 0.52 mmol) were dissolved in anhydrous THF (2 mL). The DBTDL/HDI solution was transferred to an oven-dried 50 mL Schlenk flask equipped with a stir bar and the PC solution was added dropwise with stirring. The reaction flask was sealed with a rubber septum and transferred to a Schlenk line, then placed in an oil bath and equipped with a Findexer under positive N<sub>2</sub> flow. The reaction mixture was then heated to reflux (70 °C) and allowed to stir for two hours under N<sub>2</sub>. After two hours, the PBD solution was added dropwise and the reaction mixture was allowed to stir at 65 °C for 16 h under N<sub>2</sub>.

The resulting polymer was isolated by 3x precipitations into chilled methanol. After the final precipitation, the polymer was redissolved in 30 mL of DCM and transferred to a 40 mL scintillation vial. The DCM was evaporated and then the polymer residue was dried under vacuum.

## Supplemental Experimental Data

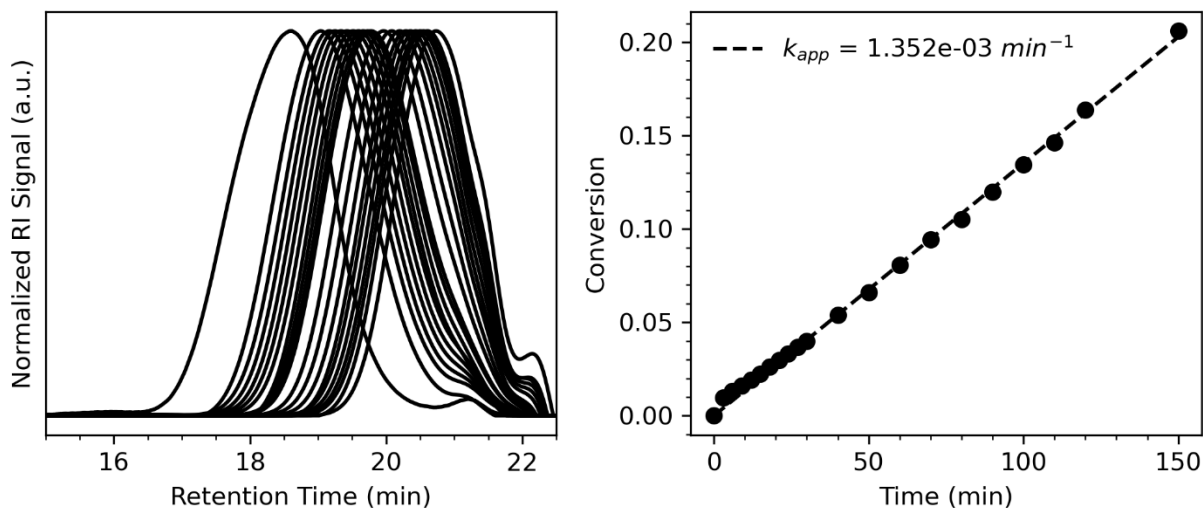

| Time  | Pks. Found | Pk. Center | Pk. Height | $X_n$  | $X_w$  | $M_n$   | $M_w$   | $\bar{D}$ |
|-------|------------|------------|------------|--------|--------|---------|---------|-----------|
| 0.0   | 1.0        | 18.593     | 18.593     | 124.05 | 242.92 | 31546.0 | 61774.0 | 1.96      |
| 3.0   | 1.0        | 19.033     | 19.033     | 43.91  | 110.6  | 11167.0 | 28126.0 | 2.52      |
| 6.0   | 1.0        | 19.165     | 19.165     | 30.96  | 92.07  | 7873.0  | 23413.0 | 2.97      |
| 9.0   | 1.0        | 19.248     | 19.248     | 25.19  | 81.03  | 6406.0  | 20606.0 | 3.22      |
| 12.0  | 1.0        | 19.333     | 19.333     | 20.5   | 71.73  | 5214.0  | 18241.0 | 3.5       |
| 15.0  | 1.0        | 19.422     | 19.422     | 16.98  | 64.01  | 4317.0  | 16278.0 | 3.77      |
| 18.0  | 1.0        | 19.515     | 19.515     | 14.02  | 57.13  | 3566.0  | 14527.0 | 4.07      |
| 21.0  | 1.0        | 19.598     | 19.598     | 13.63  | 51.62  | 3465.0  | 13126.0 | 3.79      |
| 24.0  | 1.0        | 19.657     | 19.657     | 11.4   | 47.42  | 2899.0  | 12059.0 | 4.16      |
| 27.0  | 1.0        | 19.723     | 19.723     | 9.18   | 43.72  | 2334.0  | 11117.0 | 4.76      |
| 30.0  | 1.0        | 19.775     | 19.775     | 8.52   | 40.83  | 2166.0  | 10384.0 | 4.79      |
| 40.0  | 1.0        | 19.96      | 19.96      | 6.15   | 31.68  | 1563.0  | 8056.0  | 5.15      |
| 50.0  | 1.0        | 20.082     | 20.082     | 5.22   | 26.39  | 1327.0  | 6712.0  | 5.06      |
| 60.0  | 1.0        | 20.197     | 20.197     | 4.29   | 22.05  | 1090.0  | 5607.0  | 5.14      |
| 70.0  | 1.0        | 20.287     | 20.287     | 4.21   | 19.15  | 1070.0  | 4870.0  | 4.55      |
| 80.0  | 1.0        | 20.358     | 20.358     | 3.54   | 17.3   | 901.0   | 4399.0  | 4.88      |
| 90.0  | 1.0        | 20.43      | 20.43      | 3.18   | 15.31  | 809.0   | 3894.0  | 4.81      |
| 100.0 | 1.0        | 20.5       | 20.5       | 2.76   | 13.73  | 701.0   | 3492.0  | 4.98      |
| 110.0 | 1.0        | 20.55      | 20.55      | 2.59   | 12.69  | 658.0   | 3228.0  | 4.91      |
| 120.0 | 1.0        | 20.613     | 20.613     | 2.43   | 11.4   | 619.0   | 2899.0  | 4.68      |
| 150.0 | 2.0        | 20.733     | 20.733     | 1.72   | 9.15   | 437.0   | 2327.0  | 5.32      |

**Figure S4.** Output from Python batch analysis of kinetic samples with initial conditions:  $[mTBD] = 0.0049$  M;  $[EG] = 0.29$  M (**Run 1**). Peak center and peak height correspond to the leftmost identified peak.

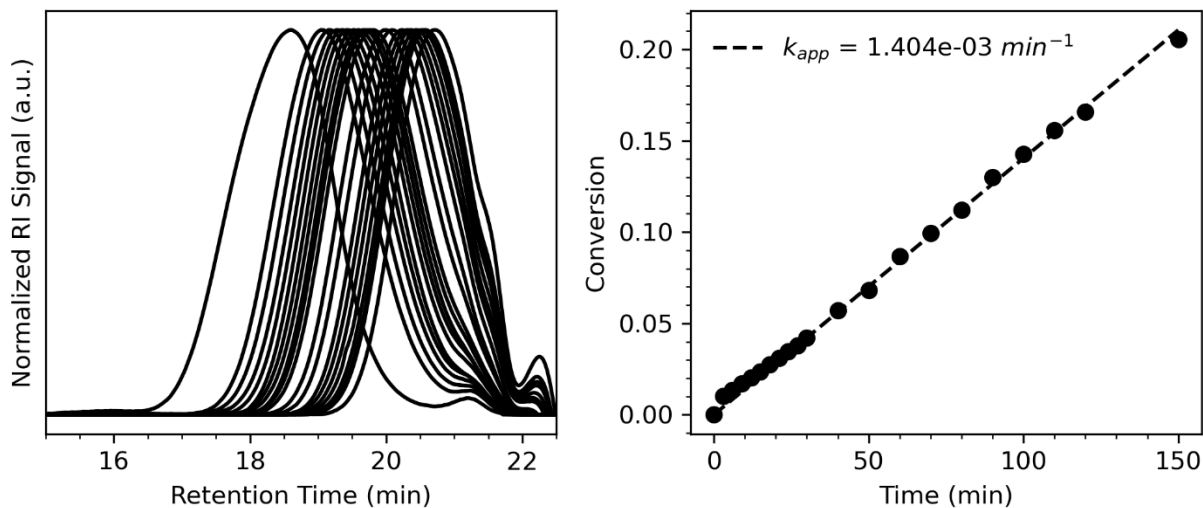

| Time  | Pks. Found | Pk. Center | Pk. Height | $X_n$  | $X_w$  | $M_n$   | $M_w$   | $\bar{D}$ |
|-------|------------|------------|------------|--------|--------|---------|---------|-----------|
| 0.0   | 1.0        | 18.593     | 18.593     | 124.05 | 242.92 | 31546.0 | 61774.0 | 1.96      |
| 3.0   | 1.0        | 19.067     | 19.067     | 43.04  | 108.11 | 10946.0 | 27493.0 | 2.51      |
| 6.0   | 1.0        | 19.16      | 19.16      | 33.5   | 91.54  | 8519.0  | 23279.0 | 2.73      |
| 9.0   | 1.0        | 19.272     | 19.272     | 25.68  | 78.08  | 6531.0  | 19857.0 | 3.04      |
| 12.0  | 1.0        | 19.363     | 19.363     | 21.37  | 68.87  | 5434.0  | 17513.0 | 3.22      |
| 15.0  | 1.0        | 19.422     | 19.422     | 19.54  | 62.2   | 4970.0  | 15817.0 | 3.18      |
| 18.0  | 1.0        | 19.523     | 19.523     | 15.21  | 55.17  | 3868.0  | 14029.0 | 3.63      |
| 21.0  | 1.0        | 19.592     | 19.592     | 12.84  | 50.02  | 3264.0  | 12720.0 | 3.9       |
| 24.0  | 1.0        | 19.665     | 19.665     | 12.06  | 45.92  | 3068.0  | 11678.0 | 3.81      |
| 27.0  | 1.0        | 19.728     | 19.728     | 10.06  | 42.62  | 2559.0  | 10837.0 | 4.23      |
| 30.0  | 1.0        | 19.815     | 19.815     | 8.67   | 38.93  | 2206.0  | 9900.0  | 4.49      |
| 40.0  | 1.0        | 19.988     | 19.988     | 6.27   | 30.03  | 1595.0  | 7637.0  | 4.79      |
| 50.0  | 1.0        | 20.085     | 20.085     | 5.66   | 25.69  | 1439.0  | 6533.0  | 4.54      |
| 60.0  | 1.0        | 20.22      | 20.22      | 4.69   | 20.66  | 1193.0  | 5254.0  | 4.4       |
| 70.0  | 1.0        | 20.32      | 20.32      | 3.85   | 18.22  | 980.0   | 4633.0  | 4.73      |
| 80.0  | 1.0        | 20.372     | 20.372     | 3.58   | 16.31  | 910.0   | 4148.0  | 4.56      |
| 90.0  | 2.0        | 20.452     | 20.452     | 3.92   | 14.18  | 998.0   | 3606.0  | 3.61      |
| 100.0 | 2.0        | 20.513     | 20.513     | 2.74   | 12.98  | 697.0   | 3300.0  | 4.73      |
| 110.0 | 2.0        | 20.572     | 20.572     | 2.53   | 11.95  | 644.0   | 3040.0  | 4.72      |
| 120.0 | 2.0        | 20.572     | 20.572     | 2.05   | 11.26  | 522.0   | 2863.0  | 5.48      |
| 150.0 | 2.0        | 20.728     | 20.728     | 1.77   | 9.17   | 449.0   | 2333.0  | 5.2       |

**Figure S5.** Output from Python batch analysis of kinetic samples with initial conditions: [mTBD] = 0.0049 M; [EG] = 0.29 M (**Run 2**). Peak center and peak height correspond to the leftmost identified peak.

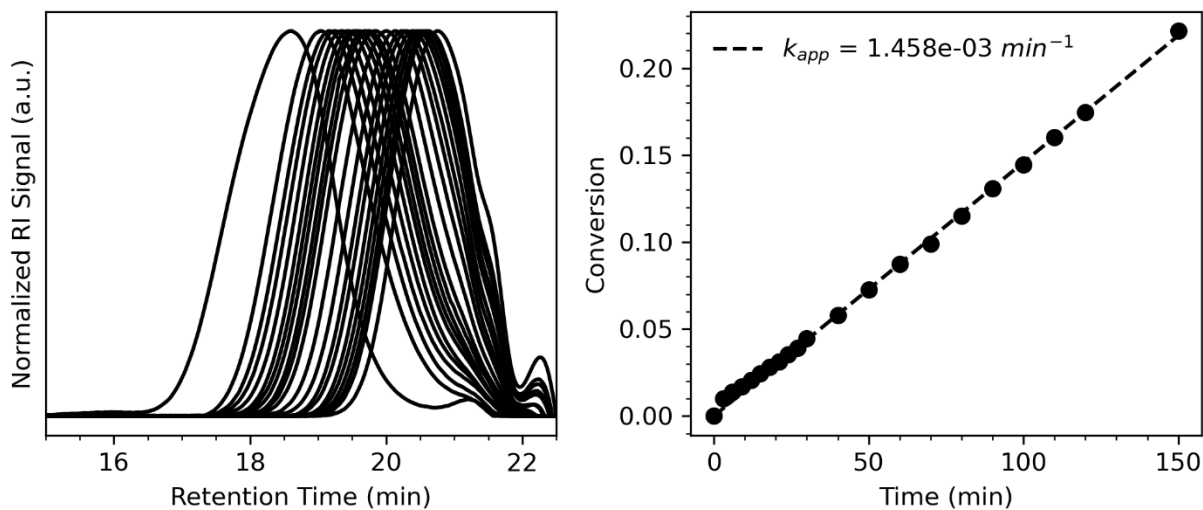

| Time  | Pks. Found | Pk. Center | Pk. Height | $X_n$  | $X_w$  | $M_n$   | $M_w$   | $\bar{D}$ |
|-------|------------|------------|------------|--------|--------|---------|---------|-----------|
| 0.0   | 1.0        | 18.593     | 18.593     | 124.05 | 242.92 | 31546.0 | 61774.0 | 1.96      |
| 3.0   | 1.0        | 19.04      | 19.04      | 41.71  | 108.7  | 10608.0 | 27643.0 | 2.61      |
| 6.0   | 1.0        | 19.157     | 19.157     | 30.44  | 89.81  | 7741.0  | 22838.0 | 2.95      |
| 9.0   | 1.0        | 19.242     | 19.242     | 23.06  | 78.8   | 5863.0  | 20040.0 | 3.42      |
| 12.0  | 1.0        | 19.36      | 19.36      | 18.62  | 68.54  | 4734.0  | 17430.0 | 3.68      |
| 15.0  | 1.0        | 19.422     | 19.422     | 16.54  | 60.35  | 4207.0  | 15348.0 | 3.65      |
| 18.0  | 1.0        | 19.527     | 19.527     | 13.29  | 54.18  | 3379.0  | 13778.0 | 4.08      |
| 21.0  | 1.0        | 19.595     | 19.595     | 11.62  | 49.77  | 2956.0  | 12657.0 | 4.28      |
| 24.0  | 1.0        | 19.68      | 19.68      | 10.81  | 45.17  | 2750.0  | 11487.0 | 4.18      |
| 27.0  | 1.0        | 19.732     | 19.732     | 9.05   | 41.49  | 2301.0  | 10551.0 | 4.59      |
| 30.0  | 1.0        | 19.85      | 19.85      | 8.0    | 37.24  | 2035.0  | 9469.0  | 4.65      |
| 40.0  | 1.0        | 19.995     | 19.995     | 6.19   | 29.74  | 1574.0  | 7564.0  | 4.81      |
| 50.0  | 1.0        | 20.142     | 20.142     | 5.16   | 24.22  | 1312.0  | 6160.0  | 4.7       |
| 60.0  | 1.0        | 20.227     | 20.227     | 4.7    | 20.51  | 1196.0  | 5216.0  | 4.36      |
| 70.0  | 1.0        | 20.292     | 20.292     | 4.15   | 18.27  | 1055.0  | 4647.0  | 4.4       |
| 80.0  | 1.0        | 20.393     | 20.393     | 3.86   | 15.89  | 981.0   | 4042.0  | 4.12      |
| 90.0  | 1.0        | 20.443     | 20.443     | 3.19   | 14.09  | 810.0   | 3584.0  | 4.42      |
| 100.0 | 1.0        | 20.525     | 20.525     | 2.97   | 12.85  | 756.0   | 3267.0  | 4.32      |
| 110.0 | 1.0        | 20.587     | 20.587     | 2.7    | 11.64  | 686.0   | 2961.0  | 4.32      |
| 120.0 | 1.0        | 20.615     | 20.615     | 2.52   | 10.72  | 641.0   | 2726.0  | 4.25      |
| 150.0 | 2.0        | 20.747     | 20.747     | 1.68   | 8.54   | 427.0   | 2171.0  | 5.08      |

**Figure S6.** Output from Python batch analysis of kinetic samples with initial conditions: [mTBD] = 0.0049 M; [EG] = 0.29 M (**Run 3**). Peak center and peak height correspond to the leftmost identified peak.

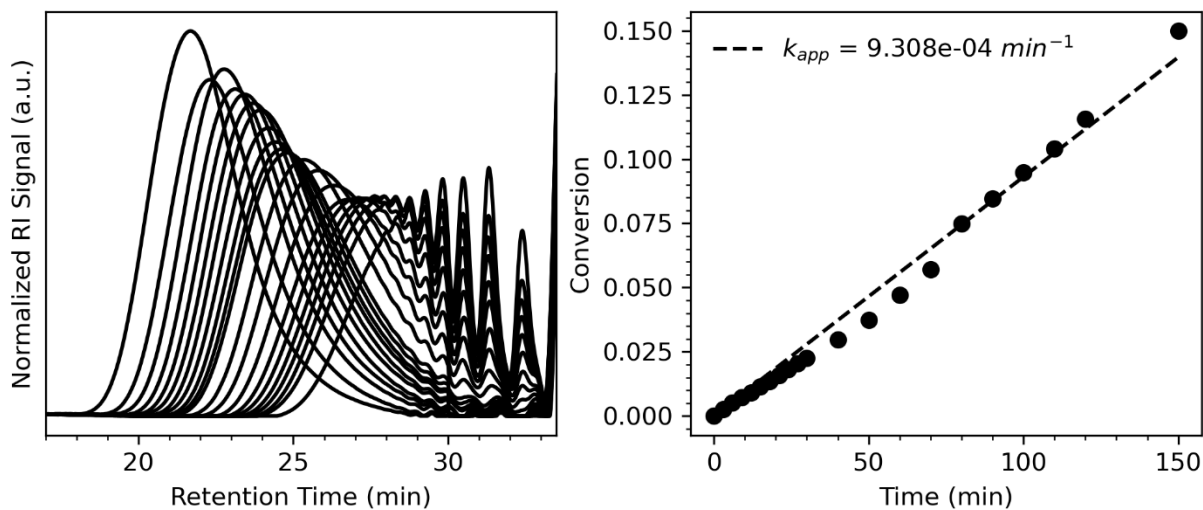

| Time  | Pks. Found | Pk. Center | Pk. Height | $X_n$  | $X_w$  | $M_n$   | $M_w$   | $\bar{D}$ |
|-------|------------|------------|------------|--------|--------|---------|---------|-----------|
| 0.0   | 2.0        | 21.683     | 21.683     | 165.76 | 278.15 | 42153.0 | 70734.0 | 1.68      |
| 3.0   | 2.0        | 22.283     | 22.283     | 113.67 | 192.42 | 28907.0 | 48932.0 | 1.69      |
| 6.0   | 2.0        | 22.767     | 22.767     | 88.26  | 150.91 | 22445.0 | 38376.0 | 1.71      |
| 9.0   | 2.0        | 23.117     | 23.117     | 72.99  | 126.78 | 18561.0 | 32241.0 | 1.74      |
| 12.0  | 2.0        | 23.417     | 23.417     | 62.9   | 110.0  | 15995.0 | 27974.0 | 1.75      |
| 15.0  | 2.0        | 23.7       | 23.7       | 53.6   | 96.13  | 13630.0 | 24445.0 | 1.79      |
| 18.0  | 2.0        | 23.933     | 23.933     | 47.69  | 85.99  | 12127.0 | 21867.0 | 1.8       |
| 21.0  | 2.0        | 24.2       | 24.2       | 41.24  | 76.61  | 10487.0 | 19481.0 | 1.86      |
| 24.0  | 2.0        | 24.433     | 24.433     | 37.14  | 69.28  | 9445.0  | 17618.0 | 1.87      |
| 27.0  | 2.0        | 24.633     | 24.633     | 33.26  | 63.42  | 8457.0  | 16128.0 | 1.91      |
| 30.0  | 2.0        | 24.817     | 24.817     | 30.09  | 58.93  | 7651.0  | 14987.0 | 1.96      |
| 40.0  | 2.0        | 25.367     | 25.367     | 22.61  | 46.93  | 5750.0  | 11934.0 | 2.08      |
| 50.0  | 2.0        | 25.767     | 25.767     | 17.25  | 38.66  | 4387.0  | 9830.0  | 2.24      |
| 60.0  | 2.0        | 26.3       | 26.3       | 13.22  | 31.6   | 3363.0  | 8035.0  | 2.39      |
| 70.0  | 2.0        | 26.8       | 26.8       | 10.79  | 26.58  | 2744.0  | 6760.0  | 2.46      |
| 80.0  | 7.0        | 27.1       | 27.1       | 5.49   | 20.76  | 1396.0  | 5279.0  | 3.78      |
| 90.0  | 7.0        | 27.35      | 27.35      | 5.25   | 18.53  | 1334.0  | 4712.0  | 3.53      |
| 100.0 | 8.0        | 27.633     | 27.633     | 5.0    | 16.64  | 1272.0  | 4231.0  | 3.33      |
| 110.0 | 8.0        | 27.95      | 27.95      | 4.85   | 15.24  | 1233.0  | 3875.0  | 3.14      |
| 120.0 | 8.0        | 28.333     | 28.333     | 4.56   | 13.8   | 1159.0  | 3509.0  | 3.03      |
| 150.0 | 8.0        | 28.367     | 28.367     | 3.96   | 10.77  | 1008.0  | 2738.0  | 2.72      |

**Figure S7.** Output from Python batch analysis of manually collected kinetic samples with initial conditions: [mTBD] = 0.0049 M; [EG] = 0.29 M (**Run 4**). Peak center and peak height correspond to the leftmost identified peak.

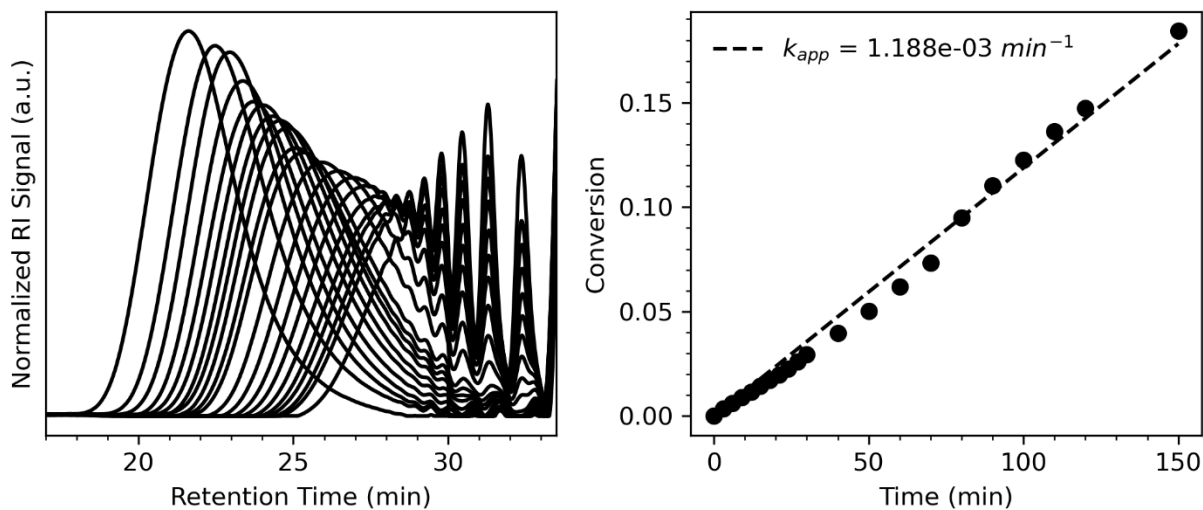

| Time  | Pks. Found | Pk. Center | Pk. Height | $X_n$  | $X_w$  | $M_n$   | $M_w$   | $\bar{D}$ |
|-------|------------|------------|------------|--------|--------|---------|---------|-----------|
| 0.0   | 2.0        | 21.617     | 21.617     | 169.32 | 284.12 | 43057.0 | 72252.0 | 1.68      |
| 3.0   | 2.0        | 22.483     | 22.483     | 103.44 | 176.6  | 26306.0 | 44910.0 | 1.71      |
| 6.0   | 2.0        | 22.933     | 22.933     | 81.41  | 139.19 | 20703.0 | 35395.0 | 1.71      |
| 9.0   | 2.0        | 23.383     | 23.383     | 65.6   | 113.71 | 16681.0 | 28917.0 | 1.73      |
| 12.0  | 2.0        | 23.7       | 23.7       | 54.46  | 96.43  | 13848.0 | 24522.0 | 1.77      |
| 15.0  | 2.0        | 24.033     | 24.033     | 45.6   | 82.9   | 11595.0 | 21081.0 | 1.82      |
| 18.0  | 2.0        | 24.333     | 24.333     | 39.3   | 72.97  | 9994.0  | 18556.0 | 1.86      |
| 21.0  | 2.0        | 24.583     | 24.583     | 33.92  | 65.3   | 8627.0  | 16605.0 | 1.92      |
| 24.0  | 2.0        | 24.783     | 24.783     | 30.11  | 58.75  | 7658.0  | 14941.0 | 1.95      |
| 27.0  | 2.0        | 25.117     | 25.117     | 26.22  | 52.47  | 6669.0  | 13342.0 | 2.0       |
| 30.0  | 2.0        | 25.317     | 25.317     | 22.76  | 47.33  | 5788.0  | 12035.0 | 2.08      |
| 40.0  | 2.0        | 25.883     | 25.883     | 15.8   | 36.72  | 4018.0  | 9338.0  | 2.32      |
| 50.0  | 2.0        | 26.4       | 26.4       | 12.25  | 29.82  | 3115.0  | 7584.0  | 2.43      |
| 60.0  | 2.0        | 26.983     | 26.983     | 9.83   | 24.78  | 2501.0  | 6301.0  | 2.52      |
| 70.0  | 2.0        | 27.333     | 27.333     | 8.31   | 21.2   | 2113.0  | 5390.0  | 2.55      |
| 80.0  | 8.0        | 27.933     | 27.933     | 5.02   | 16.61  | 1277.0  | 4224.0  | 3.31      |
| 90.0  | 8.0        | 28.333     | 28.333     | 4.65   | 14.45  | 1183.0  | 3674.0  | 3.11      |
| 100.0 | 8.0        | 28.333     | 28.333     | 4.46   | 13.07  | 1134.0  | 3323.0  | 2.93      |
| 110.0 | 8.0        | 28.333     | 28.333     | 4.23   | 11.79  | 1075.0  | 2998.0  | 2.79      |
| 120.0 | 8.0        | 28.333     | 28.333     | 4.03   | 10.94  | 1026.0  | 2781.0  | 2.71      |
| 150.0 | 7.0        | 28.75      | 28.75      | 3.59   | 8.82   | 912.0   | 2243.0  | 2.46      |

**Figure S8.** Output from Python batch analysis of manually collected kinetic samples with initial conditions: [mTBD] = 0.0049 M; [EG] = 0.29 M (**Run 5**). Peak center and peak height correspond to the leftmost identified peak.

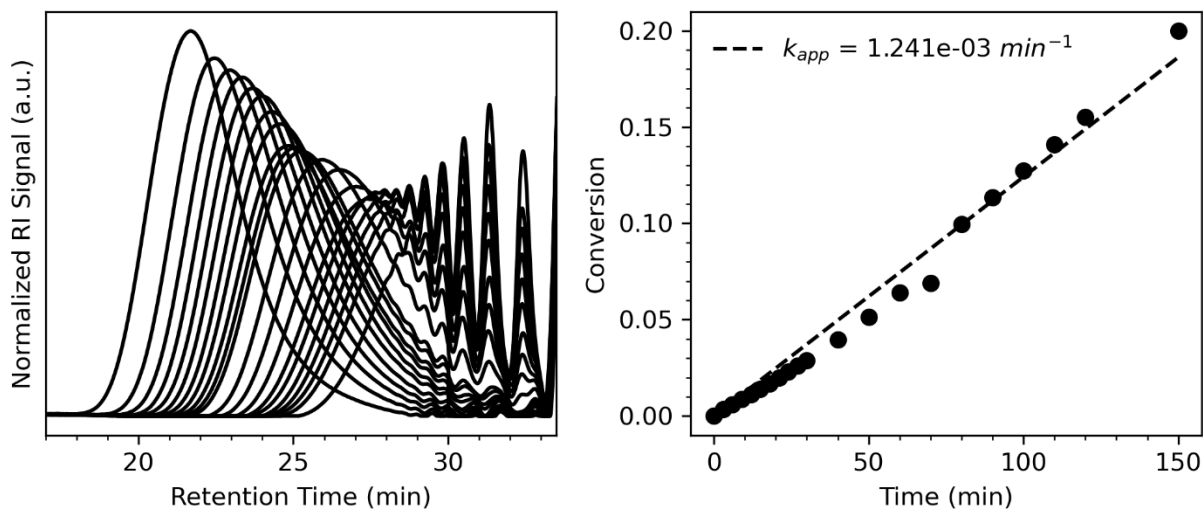

| Time  | Pks. Found | Pk. Center | Pk. Height | $X_n$  | $X_w$  | $M_n$   | $M_w$   | $\bar{D}$ |
|-------|------------|------------|------------|--------|--------|---------|---------|-----------|
| 0.0   | 2.0        | 21.667     | 21.667     | 166.2  | 278.67 | 42265.0 | 70865.0 | 1.68      |
| 3.0   | 2.0        | 22.433     | 22.433     | 105.49 | 178.75 | 26826.0 | 45455.0 | 1.69      |
| 6.0   | 2.0        | 22.967     | 22.967     | 80.48  | 138.2  | 20467.0 | 35144.0 | 1.72      |
| 9.0   | 2.0        | 23.333     | 23.333     | 65.67  | 114.45 | 16700.0 | 29105.0 | 1.74      |
| 12.0  | 2.0        | 23.7       | 23.7       | 54.93  | 97.33  | 13969.0 | 24751.0 | 1.77      |
| 15.0  | 2.0        | 24.0       | 24.0       | 45.97  | 83.89  | 11689.0 | 21334.0 | 1.83      |
| 18.0  | 2.0        | 24.3       | 24.3       | 39.75  | 73.46  | 10108.0 | 18682.0 | 1.85      |
| 21.0  | 2.0        | 24.583     | 24.583     | 34.16  | 65.1   | 8686.0  | 16554.0 | 1.91      |
| 24.0  | 2.0        | 24.85      | 24.85      | 29.64  | 58.14  | 7538.0  | 14785.0 | 1.96      |
| 27.0  | 2.0        | 25.067     | 25.067     | 25.7   | 52.17  | 6535.0  | 13268.0 | 2.03      |
| 30.0  | 2.0        | 25.233     | 25.233     | 23.46  | 48.32  | 5967.0  | 12287.0 | 2.06      |
| 40.0  | 2.0        | 25.933     | 25.933     | 15.83  | 36.71  | 4026.0  | 9335.0  | 2.32      |
| 50.0  | 2.0        | 26.467     | 26.467     | 11.8   | 29.17  | 3000.0  | 7418.0  | 2.47      |
| 60.0  | 2.0        | 27.033     | 27.033     | 9.53   | 23.96  | 2423.0  | 6094.0  | 2.52      |
| 70.0  | 3.0        | 27.633     | 27.633     | 10.66  | 22.34  | 2711.0  | 5681.0  | 2.1       |
| 80.0  | 8.0        | 27.95      | 27.95      | 4.92   | 15.87  | 1250.0  | 4036.0  | 3.23      |
| 90.0  | 8.0        | 28.333     | 28.333     | 4.64   | 14.02  | 1181.0  | 3566.0  | 3.02      |
| 100.0 | 8.0        | 28.317     | 28.317     | 4.4    | 12.58  | 1119.0  | 3199.0  | 2.86      |
| 110.0 | 8.0        | 28.35      | 28.35      | 4.11   | 11.41  | 1045.0  | 2902.0  | 2.78      |
| 120.0 | 7.0        | 28.767     | 28.767     | 3.92   | 10.4   | 996.0   | 2644.0  | 2.65      |
| 150.0 | 7.0        | 28.8       | 28.8       | 3.37   | 8.15   | 857.0   | 2072.0  | 2.42      |

**Figure S9.** Output from Python batch analysis of manually collected kinetic samples with initial conditions: [mTBD] = 0.0049 M; [EG] = 0.29 M (**Run 6**). Peak center and peak height correspond to the leftmost identified peak.

**Table S2.** ANCOVA comparing the slopes of linearized plots for automated (runs 1-3) or manual (runs 4-6) kinetic experiments. The analysis shows a significant difference in slopes.

| OLS Regression Results |                  |                     |          |       |        |        |
|------------------------|------------------|---------------------|----------|-------|--------|--------|
| =====                  |                  |                     |          |       |        |        |
| Dep. Variable:         | Y                | R-squared:          | 0.996    |       |        |        |
| Model:                 | OLS              | Adj. R-squared:     | 0.996    |       |        |        |
| Method:                | Least Squares    | F-statistic:        | 3362.    |       |        |        |
| Date:                  | Fri, 20 Mar 2026 | Prob (F-statistic): | 4.05e-44 |       |        |        |
| Time:                  | 08:04:15         | Log-Likelihood:     | 171.60   |       |        |        |
| No. Observations:      | 40               | AIC:                | -335.2   |       |        |        |
| Df Residuals:          | 36               | BIC:                | -328.4   |       |        |        |
| Df Model:              | 3                |                     |          |       |        |        |
| Covariance Type:       | nonrobust        |                     |          |       |        |        |
| =====                  |                  |                     |          |       |        |        |
|                        | coef             | std err             | t        | P> t  | [0.025 | 0.975] |
| -----                  |                  |                     |          |       |        |        |
| Intercept              | 0.0027           | 0.001               | 2.173    | 0.036 | 0.000  | 0.005  |
| Group[T.B]             | -0.0093          | 0.002               | -5.316   | 0.000 | -0.013 | -0.006 |
| X                      | 0.0014           | 1.84e-05            | 74.436   | 0.000 | 0.001  | 0.001  |
| Group[T.B]:X           | -0.0002          | 2.61e-05            | -6.352   | 0.000 | -0.000 | -0.000 |
| =====                  |                  |                     |          |       |        |        |
| Omnibus:               | 11.719           | Durbin-Watson:      | 0.468    |       |        |        |
| Prob(Omnibus):         | 0.003            | Jarque-Bera (JB):   | 12.292   |       |        |        |
| Skew:                  | -1.006           | Prob(JB):           | 0.00214  |       |        |        |
| Kurtosis:              | 4.824            | Cond. No.           | 276.     |       |        |        |
| =====                  |                  |                     |          |       |        |        |

Notes:

[1] Standard Errors assume that the covariance matrix of the errors is correctly specified.

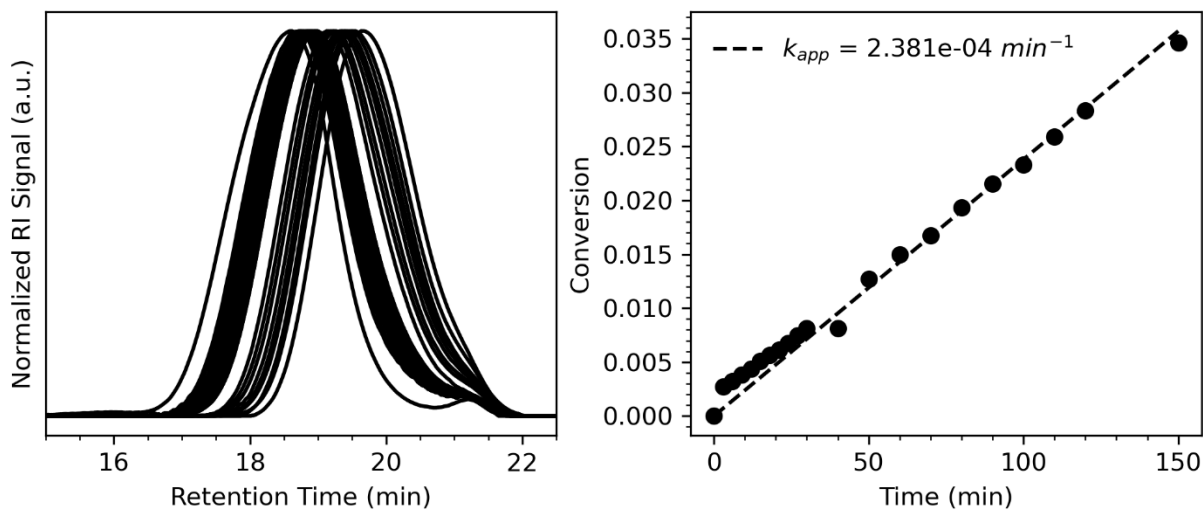

| Time  | Pks. Found | Pk. Center | Pk. Height | $X_n$  | $X_w$  | $M_n$   | $M_w$   | $\bar{D}$ |
|-------|------------|------------|------------|--------|--------|---------|---------|-----------|
| 0.0   | 1.0        | 18.593     | 18.593     | 124.05 | 242.92 | 31546.0 | 61774.0 | 1.96      |
| 3.0   | 1.0        | 18.737     | 18.737     | 81.49  | 181.71 | 20724.0 | 46208.0 | 2.23      |
| 6.0   | 1.0        | 18.74      | 18.74      | 75.6   | 173.78 | 19225.0 | 44192.0 | 2.3       |
| 9.0   | 1.0        | 18.77      | 18.77      | 70.38  | 164.87 | 17897.0 | 41926.0 | 2.34      |
| 12.0  | 1.0        | 18.802     | 18.802     | 65.55  | 157.06 | 16669.0 | 39941.0 | 2.4       |
| 15.0  | 1.0        | 18.837     | 18.837     | 61.22  | 148.65 | 15567.0 | 37801.0 | 2.43      |
| 18.0  | 1.0        | 18.853     | 18.853     | 58.51  | 142.62 | 14880.0 | 36269.0 | 2.44      |
| 21.0  | 1.0        | 18.888     | 18.888     | 54.48  | 137.88 | 13854.0 | 35064.0 | 2.53      |
| 24.0  | 1.0        | 18.898     | 18.898     | 51.85  | 132.17 | 13186.0 | 33610.0 | 2.55      |
| 27.0  | 1.0        | 18.93      | 18.93      | 47.62  | 126.09 | 12111.0 | 32065.0 | 2.65      |
| 30.0  | 1.0        | 18.982     | 18.982     | 45.31  | 121.07 | 11522.0 | 30787.0 | 2.67      |
| 40.0  | 1.0        | 18.982     | 18.982     | 45.31  | 121.07 | 11522.0 | 30787.0 | 2.67      |
| 50.0  | 1.0        | 19.133     | 19.133     | 32.3   | 94.14  | 8213.0  | 23941.0 | 2.92      |
| 60.0  | 1.0        | 19.212     | 19.212     | 26.21  | 85.0   | 6665.0  | 21616.0 | 3.24      |
| 70.0  | 1.0        | 19.253     | 19.253     | 22.95  | 79.03  | 5837.0  | 20098.0 | 3.44      |
| 80.0  | 1.0        | 19.338     | 19.338     | 19.34  | 71.4   | 4917.0  | 18158.0 | 3.69      |
| 90.0  | 1.0        | 19.38      | 19.38      | 17.63  | 66.13  | 4483.0  | 16816.0 | 3.75      |
| 100.0 | 1.0        | 19.407     | 19.407     | 15.63  | 62.44  | 3975.0  | 15878.0 | 3.99      |
| 110.0 | 1.0        | 19.457     | 19.457     | 15.68  | 57.62  | 3988.0  | 14653.0 | 3.67      |
| 120.0 | 1.0        | 19.537     | 19.537     | 13.07  | 53.81  | 3323.0  | 13684.0 | 4.12      |
| 150.0 | 1.0        | 19.645     | 19.645     | 10.93  | 45.88  | 2779.0  | 11668.0 | 4.2       |

**Figure S10.** Output from Python batch analysis of kinetic samples with initial conditions: [mTBD] = 0.00098 M; [EG] = 0.29 M (**Run 7**). Peak center and peak height correspond to the leftmost identified peak.

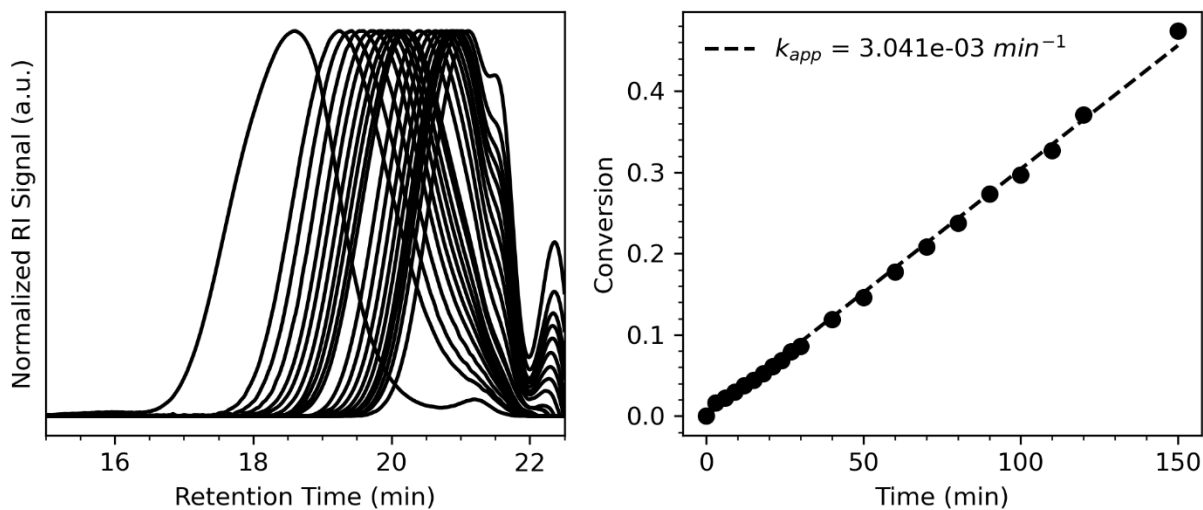

| Time  | Pks. Found | Pk. Center | Pk. Height | $X_n$  | $X_w$  | $M_n$   | $M_w$   | $\bar{D}$ |
|-------|------------|------------|------------|--------|--------|---------|---------|-----------|
| 0.0   | 1.0        | 18.593     | 18.593     | 124.05 | 242.92 | 31546.0 | 61774.0 | 1.96      |
| 3.0   | 1.0        | 19.237     | 19.237     | 23.7   | 80.29  | 6027.0  | 20417.0 | 3.39      |
| 6.0   | 1.0        | 19.418     | 19.418     | 17.31  | 64.39  | 4403.0  | 16374.0 | 3.72      |
| 9.0   | 1.0        | 19.597     | 19.597     | 12.8   | 52.22  | 3255.0  | 13280.0 | 4.08      |
| 12.0  | 1.0        | 19.73      | 19.73      | 9.82   | 42.8   | 2498.0  | 10884.0 | 4.36      |
| 15.0  | 1.0        | 19.847     | 19.847     | 8.05   | 37.35  | 2046.0  | 9499.0  | 4.64      |
| 18.0  | 1.0        | 19.945     | 19.945     | 7.22   | 32.31  | 1837.0  | 8217.0  | 4.47      |
| 21.0  | 1.0        | 20.028     | 20.028     | 6.48   | 28.33  | 1649.0  | 7205.0  | 4.37      |
| 24.0  | 1.0        | 20.093     | 20.093     | 5.56   | 25.57  | 1415.0  | 6503.0  | 4.6       |
| 27.0  | 1.0        | 20.173     | 20.173     | 4.73   | 22.46  | 1202.0  | 5711.0  | 4.75      |
| 30.0  | 1.0        | 20.238     | 20.238     | 4.52   | 20.85  | 1149.0  | 5302.0  | 4.61      |
| 40.0  | 1.0        | 20.39      | 20.39      | 3.5    | 15.42  | 889.0   | 3922.0  | 4.41      |
| 50.0  | 1.0        | 20.533     | 20.533     | 2.85   | 12.68  | 725.0   | 3225.0  | 4.45      |
| 60.0  | 1.0        | 20.64      | 20.64      | 2.28   | 10.54  | 581.0   | 2680.0  | 4.61      |
| 70.0  | 2.0        | 20.718     | 20.718     | 1.71   | 9.06   | 434.0   | 2303.0  | 5.31      |
| 80.0  | 2.0        | 20.803     | 20.803     | 1.43   | 7.96   | 363.0   | 2024.0  | 5.58      |
| 90.0  | 2.0        | 20.872     | 20.872     | 1.18   | 6.95   | 300.0   | 1768.0  | 5.89      |
| 100.0 | 2.0        | 20.888     | 20.888     | 1.05   | 6.43   | 266.0   | 1634.0  | 6.14      |
| 110.0 | 2.0        | 20.938     | 20.938     | 0.94   | 5.84   | 239.0   | 1485.0  | 6.21      |
| 120.0 | 2.0        | 21.002     | 21.002     | 0.76   | 5.17   | 192.0   | 1314.0  | 6.84      |
| 150.0 | 2.0        | 21.117     | 21.117     | 0.57   | 4.06   | 144.0   | 1033.0  | 7.17      |

**Figure S11.** Output from Python batch analysis of kinetic samples with initial conditions: [mTBD] = 0.0098 M; [EG] = 0.29 M (**Run 8**). Peak center and peak height correspond to the leftmost identified peak.

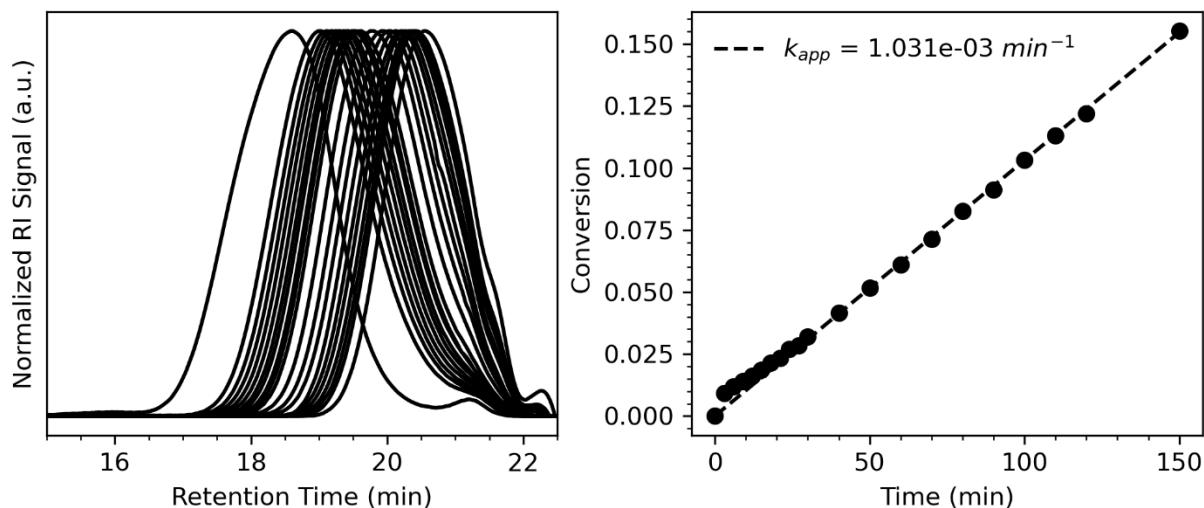

| Time  | Pks. Found | Pk. Center | Pk. Height | $X_n$  | $X_w$  | $M_n$   | $M_w$   | $\bar{D}$ |
|-------|------------|------------|------------|--------|--------|---------|---------|-----------|
| 0.0   | 1.0        | 18.593     | 18.593     | 124.05 | 242.92 | 31546.0 | 61774.0 | 1.96      |
| 3.0   | 1.0        | 18.997     | 18.997     | 40.52  | 113.4  | 10303.0 | 28837.0 | 2.8       |
| 6.0   | 1.0        | 19.12      | 19.12      | 32.74  | 98.7   | 8325.0  | 25099.0 | 3.01      |
| 9.0   | 1.0        | 19.177     | 19.177     | 27.77  | 88.98  | 7062.0  | 22627.0 | 3.2       |
| 12.0  | 1.0        | 19.255     | 19.255     | 23.5   | 80.74  | 5977.0  | 20531.0 | 3.44      |
| 15.0  | 1.0        | 19.287     | 19.287     | 20.77  | 73.27  | 5283.0  | 18633.0 | 3.53      |
| 18.0  | 1.0        | 19.355     | 19.355     | 17.68  | 66.6   | 4497.0  | 16937.0 | 3.77      |
| 21.0  | 1.0        | 19.427     | 19.427     | 15.52  | 62.11  | 3947.0  | 15794.0 | 4.0       |
| 24.0  | 1.0        | 19.502     | 19.502     | 13.53  | 55.91  | 3441.0  | 14219.0 | 4.13      |
| 27.0  | 1.0        | 19.522     | 19.522     | 13.33  | 53.62  | 3390.0  | 13635.0 | 4.02      |
| 30.0  | 1.0        | 19.615     | 19.615     | 10.99  | 48.94  | 2795.0  | 12445.0 | 4.45      |
| 40.0  | 1.0        | 19.758     | 19.758     | 8.12   | 39.51  | 2064.0  | 10047.0 | 4.87      |
| 50.0  | 1.0        | 19.947     | 19.947     | 6.4    | 32.77  | 1628.0  | 8334.0  | 5.12      |
| 60.0  | 1.0        | 20.043     | 20.043     | 5.69   | 28.36  | 1446.0  | 7211.0  | 4.99      |
| 70.0  | 1.0        | 20.118     | 20.118     | 5.3    | 24.65  | 1348.0  | 6269.0  | 4.65      |
| 80.0  | 1.0        | 20.205     | 20.205     | 4.55   | 21.6   | 1158.0  | 5493.0  | 4.74      |
| 90.0  | 1.0        | 20.26      | 20.26      | 4.09   | 19.73  | 1039.0  | 5017.0  | 4.83      |
| 100.0 | 1.0        | 20.337     | 20.337     | 3.7    | 17.59  | 941.0   | 4473.0  | 4.75      |
| 110.0 | 1.0        | 20.392     | 20.392     | 3.5    | 16.15  | 891.0   | 4108.0  | 4.61      |
| 120.0 | 1.0        | 20.413     | 20.413     | 3.42   | 15.07  | 869.0   | 3833.0  | 4.41      |
| 150.0 | 1.0        | 20.56      | 20.56      | 2.72   | 11.99  | 692.0   | 3050.0  | 4.41      |

**Figure S12.** Output from Python batch analysis of kinetic samples with initial conditions: [mTBD] = 0.0049 M; [EG] = 0.193 M (**Run 9**). Peak center and peak height correspond to the leftmost identified peak.

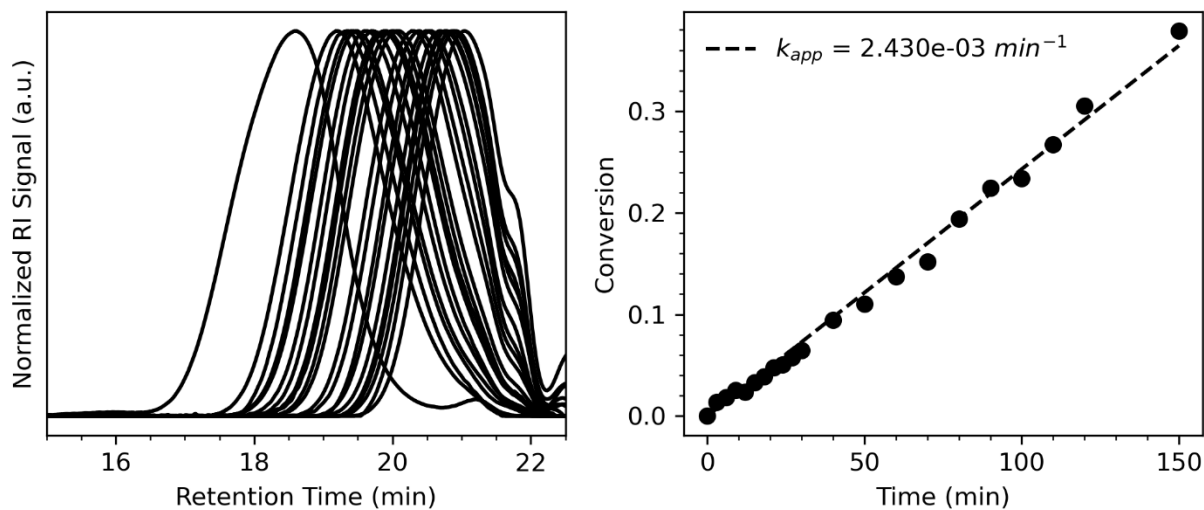

| Time  | Pks. Found | Pk. Center | Pk. Height | $X_n$  | $X_w$  | $M_n$   | $M_w$   | $\bar{D}$ |
|-------|------------|------------|------------|--------|--------|---------|---------|-----------|
| 0.0   | 1.0        | 18.593     | 18.593     | 124.05 | 242.92 | 31546.0 | 61774.0 | 1.96      |
| 3.0   | 1.0        | 19.193     | 19.193     | 30.54  | 88.99  | 7767.0  | 22631.0 | 2.91      |
| 6.0   | 1.0        | 19.353     | 19.353     | 23.89  | 73.4   | 6075.0  | 18666.0 | 3.07      |
| 9.0   | 1.0        | 19.487     | 19.487     | 14.72  | 58.29  | 3743.0  | 14824.0 | 3.96      |
| 12.0  | 1.0        | 19.41      | 19.41      | 17.16  | 62.22  | 4363.0  | 15822.0 | 3.63      |
| 15.0  | 1.0        | 19.6       | 19.6       | 11.17  | 47.53  | 2840.0  | 12087.0 | 4.26      |
| 18.0  | 1.0        | 19.703     | 19.703     | 10.06  | 41.92  | 2559.0  | 10661.0 | 4.17      |
| 21.0  | 1.0        | 19.892     | 19.892     | 7.51   | 35.3   | 1910.0  | 8976.0  | 4.7       |
| 24.0  | 1.0        | 19.912     | 19.912     | 6.63   | 33.3   | 1687.0  | 8467.0  | 5.02      |
| 27.0  | 1.0        | 20.0       | 20.0       | 6.2    | 29.83  | 1577.0  | 7585.0  | 4.81      |
| 30.0  | 1.0        | 20.09      | 20.09      | 5.29   | 26.86  | 1344.0  | 6831.0  | 5.08      |
| 40.0  | 1.0        | 20.283     | 20.283     | 3.61   | 19.08  | 919.0   | 4852.0  | 5.28      |
| 50.0  | 1.0        | 20.377     | 20.377     | 3.01   | 16.57  | 765.0   | 4215.0  | 5.51      |
| 60.0  | 1.0        | 20.488     | 20.488     | 2.74   | 13.5   | 697.0   | 3433.0  | 4.93      |
| 70.0  | 1.0        | 20.538     | 20.538     | 2.39   | 12.26  | 609.0   | 3118.0  | 5.12      |
| 80.0  | 1.0        | 20.698     | 20.698     | 1.8    | 9.7    | 457.0   | 2466.0  | 5.4       |
| 90.0  | 1.0        | 20.76      | 20.76      | 1.64   | 8.42   | 417.0   | 2142.0  | 5.14      |
| 100.0 | 1.0        | 20.78      | 20.78      | 1.64   | 8.1    | 416.0   | 2059.0  | 4.95      |
| 110.0 | 1.0        | 20.86      | 20.86      | 1.29   | 7.12   | 329.0   | 1810.0  | 5.5       |
| 120.0 | 2.0        | 20.91      | 20.91      | 0.95   | 6.25   | 242.0   | 1590.0  | 6.57      |
| 150.0 | 2.0        | 21.037     | 21.037     | 0.74   | 5.06   | 189.0   | 1287.0  | 6.81      |

**Figure S13.** Output from Python batch analysis of kinetic samples with initial conditions: [mTBD] = 0.0049 M; [EG] = 0.384 M (**Run 10**). Peak center and peak height correspond to the leftmost identified peak.

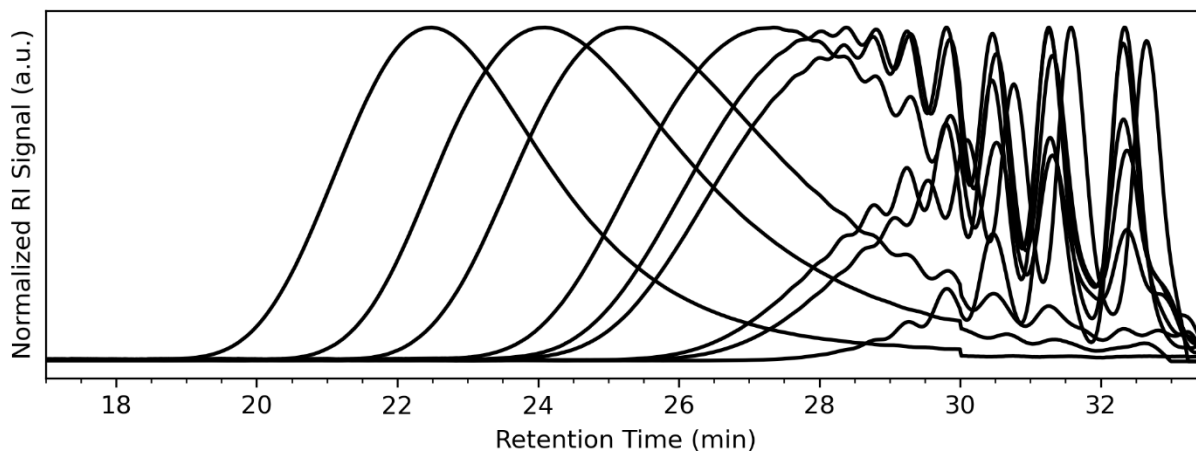

| Sample | [mTBD]  | Time   | Pks. Fnd. | Pk. Cntr. | Pk. Ht. | $X_n$  | $X_w$  | $M_n$ | $M_w$ | $\bar{D}$ |
|--------|---------|--------|-----------|-----------|---------|--------|--------|-------|-------|-----------|
| 1      | 0.00098 | 11.7   | 1         | 22.483    | 22.483  | 102.22 | 176.75 | 25994 | 44947 | 1.73      |
| 2      | 0.0098  | 41.92  | 7         | 28.383    | 28.383  | 6.1    | 15.63  | 1552  | 3974  | 2.56      |
| 3      | 0.0049  | 64.16  | 2         | 27.35     | 27.35   | 8.47   | 22.32  | 2155  | 5677  | 2.63      |
| 4      | 0.00098 | 71.02  | 2         | 24.1      | 24.1    | 37.78  | 79.61  | 9608  | 20245 | 2.11      |
| 5      | 0.0098  | 93.94  | 6         | 29.55     | 29.55   | 2.92   | 6.26   | 742   | 1593  | 2.15      |
| 6      | 0.0049  | 103.53 | 7         | 28.767    | 28.767  | 5.67   | 13.9   | 1443  | 3535  | 2.45      |
| 7      | 0.00098 | 148.21 | 1         | 25.267    | 25.267  | 19.6   | 46.98  | 4984  | 11947 | 2.4       |
| 8      | 0.0098  | 190.43 | 5         | 29.817    | 29.817  | 2.26   | 3.72   | 575   | 945   | 1.64      |
| 9      | 0.0049  | 190.56 | 6         | 29.25     | 29.25   | 3.86   | 7.73   | 981   | 1967  | 2.01      |

**Figure S14.** Output from Python batch analysis of first AI-guided sample collection series. The concentration of mTBD is provided in units of mol/L. Peak center and peak height correspond to the leftmost identified peak.

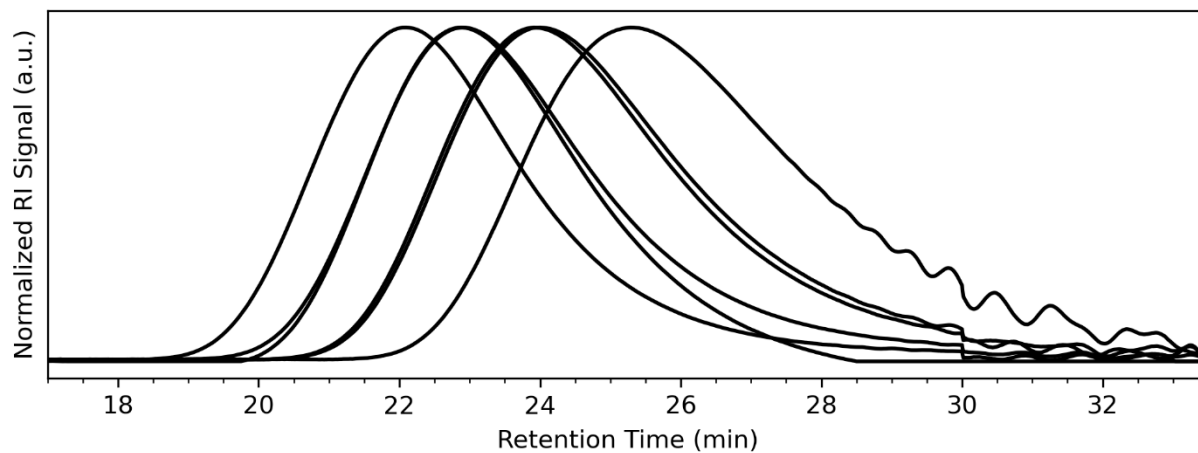

| Sample | [mTBD]  | Time  | Pks. Fnd. | Pk. Cntr. | Pk. Ht. | $X_n$  | $X_w$  | $M_n$ | $M_w$ | $\bar{D}$ |
|--------|---------|-------|-----------|-----------|---------|--------|--------|-------|-------|-----------|
| 1      | 0.00098 | 3.94  | 1         | 22.1      | 22.1    | 126.98 | 218.04 | 32292 | 55447 | 1.72      |
| 2      | 0.0049  | 3.92  | 1         | 22.9      | 22.9    | 79.7   | 141.58 | 20267 | 36005 | 1.78      |
| 3      | 0.0098  | 3.91  | 2         | 23.917    | 23.917  | 46.25  | 86.25  | 11762 | 21934 | 1.86      |
| 4      | 0.0049  | 14.33 | 1         | 24.0      | 24.0    | 42.46  | 82.46  | 10797 | 20969 | 1.94      |
| 5      | 0.0098  | 14.32 | 1         | 25.283    | 25.283  | 19.18  | 46.19  | 4877  | 11745 | 2.41      |
| 6      | 0.00098 | 24.71 | 1         | 22.883    | 22.883  | 92.57  | 147.27 | 23540 | 37450 | 1.59      |

**Figure S15.** Output from Python batch analysis of second AI-guided sample collection series. The concentration of mTBD is provided in units of mol/L. Peak center and peak height correspond to the leftmost identified peak.

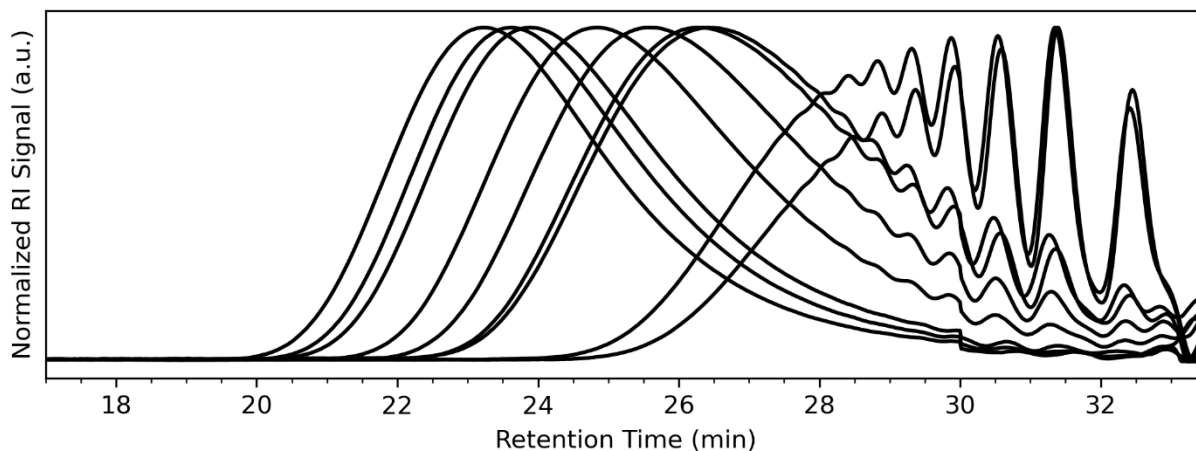

| Sample | [mTBD]  | Time  | Pks. Fnd. | Pk. Cntr. | Pk. Ht. | $X_n$ | $X_w$  | $M_n$ | $M_w$ | $\bar{D}$ |
|--------|---------|-------|-----------|-----------|---------|-------|--------|-------|-------|-----------|
| 1      | 0.0049  | 24.68 | 1         | 24.833    | 24.833  | 25.48 | 56.32  | 6480  | 14323 | 2.21      |
| 2      | 0.0098  | 24.64 | 1         | 26.417    | 26.417  | 9.99  | 28.88  | 2540  | 7343  | 2.89      |
| 3      | 0.00098 | 35.06 | 1         | 23.217    | 23.217  | 66.79 | 119.76 | 16985 | 30454 | 1.79      |
| 4      | 0.0049  | 35.07 | 1         | 25.6      | 25.6    | 15.63 | 40.78  | 3975  | 10370 | 2.61      |
| 5      | 0.00098 | 46.24 | 1         | 23.617    | 23.617  | 54.31 | 99.2   | 13812 | 25227 | 1.83      |
| 6      | 0.0049  | 45.43 | 1         | 26.333    | 26.333  | 11.01 | 30.71  | 2800  | 7809  | 2.79      |
| 7      | 0.00098 | 55.77 | 1         | 23.883    | 23.883  | 45.89 | 87.16  | 11670 | 22164 | 1.9       |
| 8      | 0.0098  | 55.83 | 7         | 28.833    | 28.833  | 4.91  | 12.27  | 1248  | 3121  | 2.5       |
| 9      | 0.0098  | 66.19 | 6         | 29.367    | 29.367  | 4.27  | 10.18  | 1085  | 2589  | 2.39      |

**Figure S16.** Output from Python batch analysis of third AI-guided sample collection series. The concentration of mTBD is provided in units of mol/L. Peak center and peak height correspond to the leftmost identified peak.

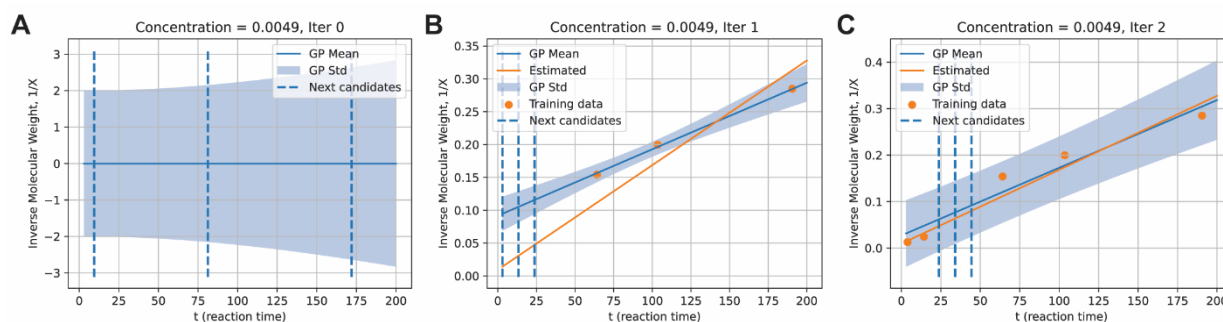

**Figure S17.** Iterative evolution of the surrogate model across active-learning cycles for kinetic experiments using 5 mol% mTBD (conditions from runs 1-6). The GP mean and Std represent the posterior expected prediction and associated uncertainty of the target response conditioned on the available training data. Newly acquired training data progressively refine the kinetic trend and reduce uncertainty, while the estimated regression line over the training points provides a slope-based estimate of the rate constant.

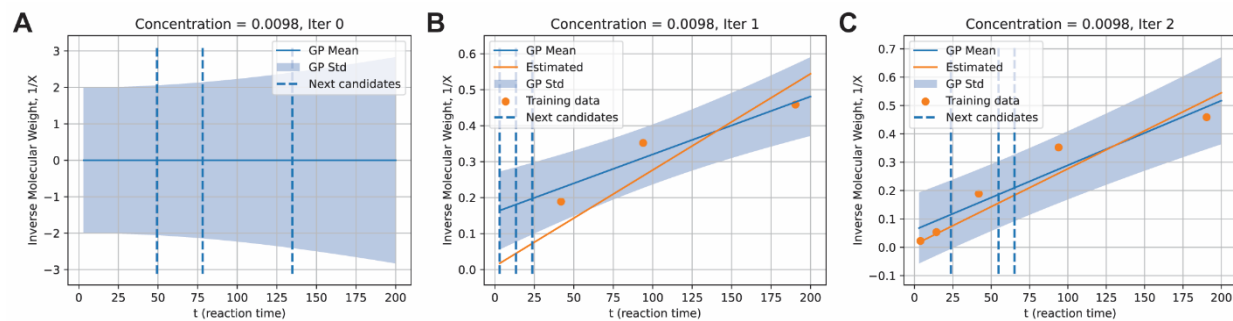

**Figure S18.** Iterative evolution of the surrogate model across active-learning cycles for kinetic experiments using 10 mol% mTBD (conditions from run 8). The GP mean and Std represent the posterior expected prediction and associated uncertainty of the target response conditioned on the available training data. Newly acquired training data progressively refine the kinetic trend and reduce uncertainty, while the estimated regression line over the training points provides a slope-based estimate of the rate constant.

**Tables S3.** ANCOVA comparing the slopes of linearized plots for automated kinetic experiments (run 7) from our initial workflow to those from AI-guided experiments. The analysis shows no significant difference in slopes.

OLS Regression Results

```

=====
Dep. Variable:          Conv    R-squared:                0.996
Model:                 OLS     Adj. R-squared:           0.996
Method:                Least Squares    F-statistic:              2097.
Date:                  Fri, 20 Mar 2026    Prob (F-statistic):       3.57e-28
Time:                  08:26:36    Log-Likelihood:           165.56
No. Observations:     27     AIC:                      -323.1
Df Residuals:         23     BIC:                      -317.9
Df Model:              3
Covariance Type:      nonrobust

```

```

=====
              coef    std err          t      P>|t|      [0.025    0.975]
-----
Intercept      0.0006      0.000      2.083      0.049      4.45e-06      0.001
Group[T.B]     0.0009      0.000      2.510      0.020      0.000      0.002
Time           0.0002     4.72e-06     49.430     0.000      0.000      0.000
Group[T.B]:Time -1.345e-05     5.9e-06     -2.281     0.032     -2.57e-05     -1.25e-06

```

```

=====
Omnibus:          39.160    Durbin-Watson:           1.896
Prob(Omnibus):    0.000    Jarque-Bera (JB):        143.222
Skew:             -2.715    Prob(JB):                 7.94e-32
Kurtosis:         12.890    Cond. No.                  319.

```

Notes:

[1] Standard Errors assume that the covariance matrix of the errors is correctly specified.

**Table S4.** ANCOVA comparing the slopes of linearized plots for automated kinetic experiments (runs 1-3) from our initial workflow to those from AI-guided experiments. The analysis shows no significant difference in slopes.

| OLS Regression Results |                  |                     |          |       |           |        |
|------------------------|------------------|---------------------|----------|-------|-----------|--------|
| =====                  |                  |                     |          |       |           |        |
| Dep. Variable:         | Conv             | R-squared:          | 0.995    |       |           |        |
| Model:                 | OLS              | Adj. R-squared:     | 0.995    |       |           |        |
| Method:                | Least Squares    | F-statistic:        | 3961.    |       |           |        |
| Date:                  | Fri, 20 Mar 2026 | Prob (F-statistic): | 6.73e-69 |       |           |        |
| Time:                  | 08:26:36         | Log-Likelihood:     | 270.98   |       |           |        |
| No. Observations:      | 64               | AIC:                | -534.0   |       |           |        |
| Df Residuals:          | 60               | BIC:                | -525.3   |       |           |        |
| Df Model:              | 3                |                     |          |       |           |        |
| Covariance Type:       | nonrobust        |                     |          |       |           |        |
| =====                  |                  |                     |          |       |           |        |
|                        | coef             | std err             | t        | P> t  | [0.025    | 0.975] |
| -----                  |                  |                     |          |       |           |        |
| Intercept              | 0.0004           | 0.002               | 0.167    | 0.868 | -0.004    | 0.005  |
| Group[T.B]             | 0.0026           | 0.002               | 1.095    | 0.278 | -0.002    | 0.007  |
| Time                   | 0.0013           | 4.38e-05            | 29.262   | 0.000 | 0.001     | 0.001  |
| Group[T.B]:Time        | 8.059e-05        | 4.57e-05            | 1.765    | 0.083 | -1.07e-05 | 0.000  |
| =====                  |                  |                     |          |       |           |        |
| Omnibus:               | 5.734            | Durbin-Watson:      | 0.615    |       |           |        |
| Prob(Omnibus):         | 0.057            | Jarque-Bera (JB):   | 4.946    |       |           |        |
| Skew:                  | 0.527            | Prob(JB):           | 0.0843   |       |           |        |
| Kurtosis:              | 3.862            | Cond. No.           | 579.     |       |           |        |
| =====                  |                  |                     |          |       |           |        |

Notes:

[1] Standard Errors assume that the covariance matrix of the errors is correctly specified.

**Table S5.** ANCOVA comparing the slopes of linearized plots for automated kinetic experiments (runs 8) from our initial workflow to those from AI-guided experiments. The analysis shows no significant difference in slopes.

| OLS Regression Results |         |                  |                     |       |        |          |
|------------------------|---------|------------------|---------------------|-------|--------|----------|
| =====                  |         |                  |                     |       |        |          |
| Dep. Variable:         |         | Conv             | R-squared:          |       |        | 0.995    |
| Model:                 |         | OLS              | Adj. R-squared:     |       |        | 0.994    |
| Method:                |         | Least Squares    | F-statistic:        |       |        | 1330.    |
| Date:                  |         | Fri, 20 Mar 2026 | Prob (F-statistic): |       |        | 5.20e-25 |
| Time:                  |         | 08:26:36         | Log-Likelihood:     |       |        | 88.859   |
| No. Observations:      |         | 26               | AIC:                |       |        | -169.7   |
| Df Residuals:          |         | 22               | BIC:                |       |        | -164.7   |
| Df Model:              |         | 3                |                     |       |        |          |
| Covariance Type:       |         | nonrobust        |                     |       |        |          |
| =====                  |         |                  |                     |       |        |          |
|                        | coef    | std err          | t                   | P> t  | [0.025 | 0.975]   |
| -----                  |         |                  |                     |       |        |          |
| Intercept              | -0.0125 | 0.006            | -2.164              | 0.042 | -0.025 | -0.001   |
| Group[T.B]             | 0.0123  | 0.007            | 1.864               | 0.076 | -0.001 | 0.026    |
| Time                   | 0.0032  | 0.000            | 29.027              | 0.000 | 0.003  | 0.003    |
| Group[T.B]:Time        | -0.0002 | 0.000            | -1.872              | 0.075 | -0.000 | 2.5e-05  |
| =====                  |         |                  |                     |       |        |          |
| Omnibus:               |         | 6.210            | Durbin-Watson:      |       |        | 1.548    |
| Prob(Omnibus):         |         | 0.045            | Jarque-Bera (JB):   |       |        | 4.627    |
| Skew:                  |         | 0.641            | Prob(JB):           |       |        | 0.0989   |
| Kurtosis:              |         | 4.621            | Cond. No.           |       |        | 375.     |
| =====                  |         |                  |                     |       |        |          |

Notes:

[1] Standard Errors assume that the covariance matrix of the errors is correctly specified.

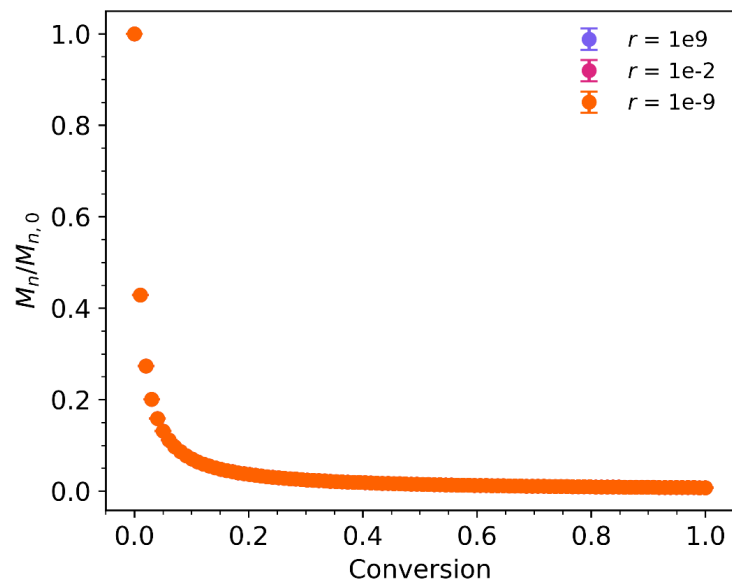

**Figure S19.** Overlaid  $M_n$  decay curves for simulations with different initial  $r$ .

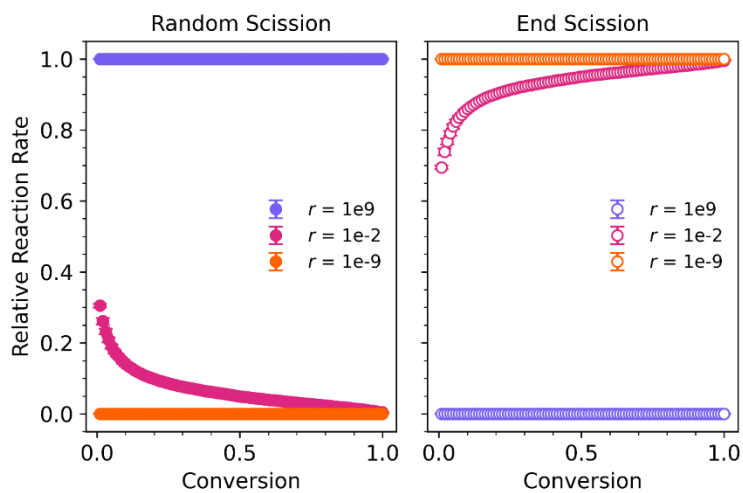

**Figure S20.** Relative reaction rate plots for simulations with different initial  $r$ .

*End Group Analysis of Polycarbonate Oligomers by  $^1\text{H}$  NMR.* To determine the  $M_n$  of various PC oligomers, the integration of signal **d** corresponding to the end group aromatic protons at  $\sim 7.0$  ppm was calibrated to 4.0. The integration corresponding to aromatic protons **a** and **b** from the repeat unit was then divided by 8.0, and this value was multiplied by the molar mass of the repeat unit (254.3 g/mol).

**Figure S21.** Representative  $^1\text{H}$  NMR spectrum of a polycarbonate oligomer isolated from a 90-minute deconstruction reaction.

*Determination of *t*-Bu Content by <sup>1</sup>H NMR.* To determine the percentage of *t*-Bu chain ends present in a PC oligomer, the integration of signal **d** corresponding to the end group aromatic protons at ~7.0 ppm was calibrated to 4.0. The integration corresponding to the methyl protons **g** at 1.25 ppm was then divided by 18.0.

**Figure S22.** Representative <sup>1</sup>H NMR stack of *t*-Bu content determination for a series of polycarbonate oligomers.

**Table S6.** *t*-Bu content of twenty autonomously synthesized deconstruction oligomers as determined by <sup>1</sup>H NMR spectroscopy (see Figure S22 above).

| <b>Time (min)</b> | <b><i>t</i>-Bu Content (%)</b> |
|-------------------|--------------------------------|
| 0                 | 100                            |
| 3                 | 37.6                           |
| 6                 | 29.4                           |
| 9                 | 26.7                           |
| 12                | 23.2                           |
| 15                | 20.8                           |
| 18                | 19.9                           |
| 21                | 19.6                           |
| 24                | 17.1                           |
| 27                | 16.1                           |
| 30                | 14.5                           |
| 40                | 12.8                           |
| 50                | 11.4                           |
| 60                | 10.3                           |
| 70                | 10.2                           |
| 80                | 8.5                            |
| 90                | 8.44                           |
| 100               | 8.39                           |
| 110               | 8.11                           |
| 120               | 7.94                           |
| 150               | 7.61                           |

**Figure S23.** *t*-Bu content of twenty autonomously synthesized PC oligomers plotted against deconstruction time.

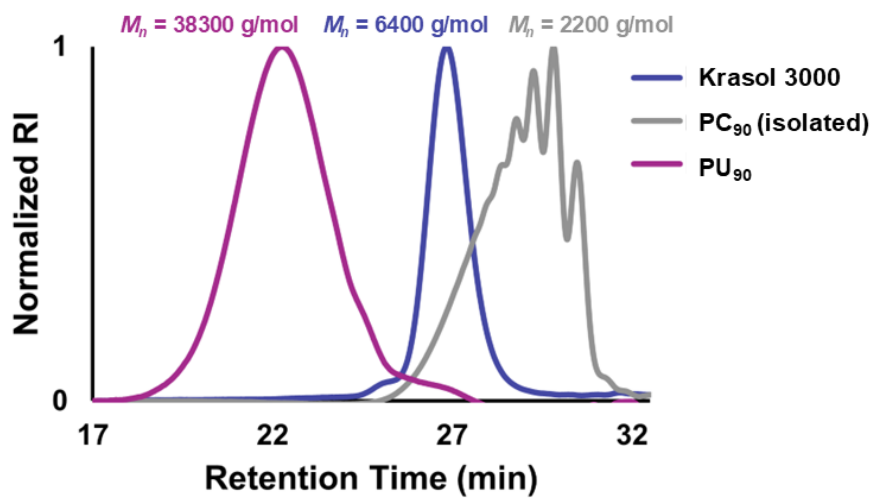

**Figure S24.** Overlaid SEC Chromatograms of PU<sub>90</sub>, PC, and Krasol 3000.

*Determination of Polycarbonate Incorporation in PU<sub>90</sub>.* To determine the incorporation of PC in PU<sub>90</sub>, the combined integration of the aliphatic proton signals corresponding to Krasol 3000 with chemical shift 0.50 – 1.38 ppm (highlighted in blue) was calibrated to 16.0 and then the mole fraction of PC was calculated using the integration of the repeat aromatic protons in the PC segment with chemical shift ~7.1 – 7.2 ppm (highlighted in gray).

**Figure S25.** <sup>1</sup>H NMR Spectrum of PU<sub>90</sub> synthesized from a PC<sub>90</sub> hard segment and Krasol 3000 soft segment.

*PC<sub>90</sub> Autonomous Macromonomer Purification.* Solutions of polycarbonate oligomer synthesized from a 90-min automated deconstruction were combined into a round bottom flask and concentrated by evaporation. The oligomer solution was then precipitated 3x into methanol and dried under vacuum before use in polyurethane synthesis. The final  $M_n$  of the combined oligomer was 2,485 g/mol.

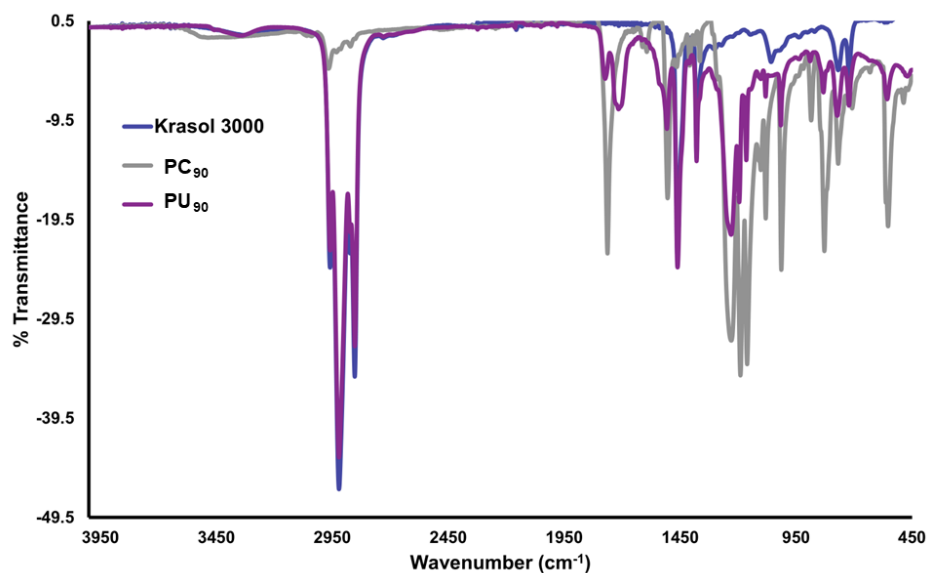

Figure S26. Overlaid IR spectra of PC<sub>90</sub>, Krasol 3000, and PU<sub>90</sub>.

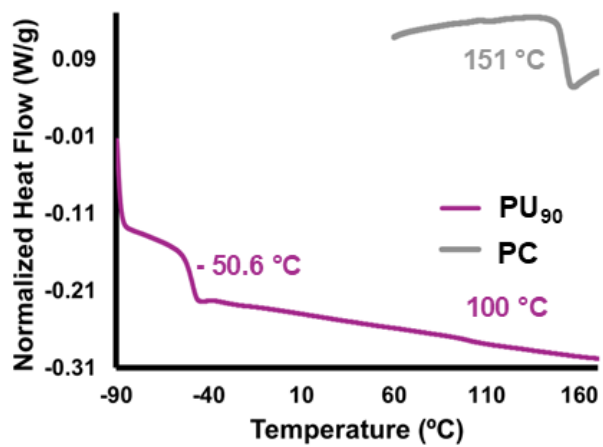

Figure S27. Overlaid DSC thermograms of PU<sub>90</sub> and PC.

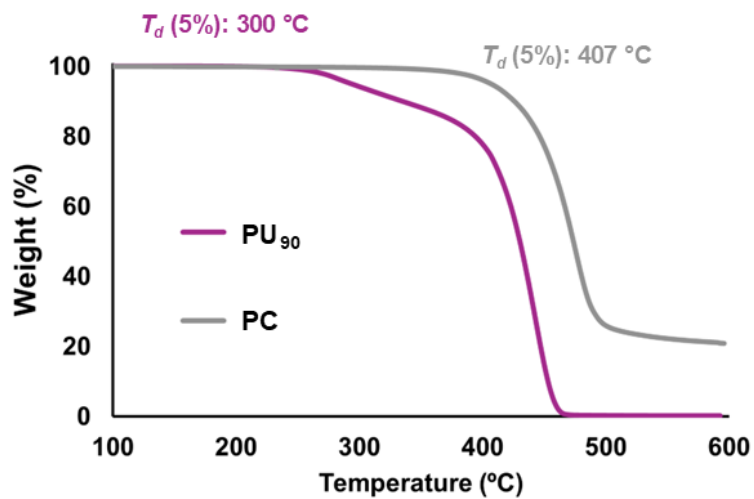

**Figure S28.** Overlaid TGA thermograms of PU<sub>90</sub> and PC.

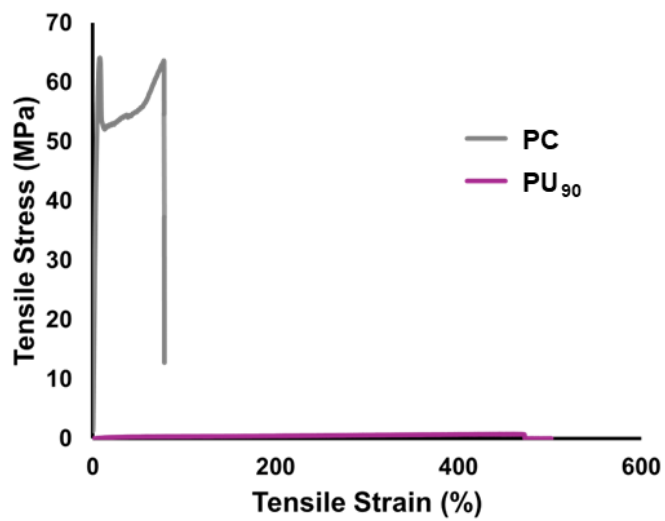

**Figure S29.** Overlaid Stress vs Strain plots of PU<sub>90</sub> and PC.

**Table S7.** Tensile testing value for PU<sub>90</sub> and PC. Values shown are an average of quintuplicate samples.

| Polymer          | Max Force [N] | Strain at break (%) | Max. Tensile Strain (mm) | Tensile Stress at Max Force (MPa) |
|------------------|---------------|---------------------|--------------------------|-----------------------------------|
| PC               | 55.19 ± 5.84  | 81.76 ± 4.23        | 8.3 ± 0.43               | 63.45 ± 1.94                      |
| PU <sub>90</sub> | 0.410 ± 0.034 | 568.65 ± 52.29      | 64.51 ± 5.86             | 0.697 ± 0.037                     |

## Appendix A: Mathematical Model of Polymer Chain Scission

Experimental and simulation data are fit with a mathematical model of polymer random chain scission developed by Staggs.<sup>5</sup> For a population  $N$  polymer chains consisting of  $n$  repeat units and  $n - 1$  bonds, let  $N_x$  represent the number of molecules in the distribution with  $x$  repeat units and  $f_x$  their corresponding frequency. The total number of unbroken bonds,  $B$ , in the distribution at conversion  $p$  (as defined in Eq. S6) is given by

$$B(p) = \sum_{x=1}^n (x - 1) N_x(p) \quad (\text{S12})$$

By defining the number average degree of polymerization as

$$X_n = \sum_{x=1}^n x f_x(p) \quad (\text{S13})$$

it follows that

$$1 - p = \frac{N(p)[X_n(p) - 1]}{N(0)[X_n(0) - 1]} \quad (\text{S14})$$

where  $N(0)$  and  $X_n(0)$  represent the number of chains and their degree of polymerization, respectively, at  $p = 0$ . Each bond breaking event increases the total number of molecules in the population of chains such that

$$\frac{N(p)}{N(0)} = 1 + p(X_n(0) - 1) \quad (\text{S15})$$

Combing S14 and S15 gives

$$\frac{X_n(p)}{X_n(0)} = \frac{1}{1 + p(X_n(0) - 1)} \quad (\text{S16})$$

which can be re-arranged to linearly relate the instantaneous  $X_n$  to  $p$

$$\frac{1}{X_n(p)} - \frac{1}{X_n(0)} = \frac{X_n(0) - 1}{X_n(0)} p \quad (\text{S17})$$

noting that for very large polymers with  $X_n(0) \gg 1$  and the equation can be simplified to directly relate the inverse  $X_n$  to  $p$ . For convenience, Eq. S16 can be expressed in terms of  $M_w$  by using Eq. S5, giving the following relationship useful for fitting all forms of polymer scission data regardless of the scission mechanism

$$\frac{M_w(p)}{M_w(0)} = \frac{\mathfrak{D}(p)}{\mathfrak{D}(0)} \left[ \frac{1}{1 + p(X_n(0) - 1)} \right] \quad (\text{S18})$$

## References

- (1) Do, T.; Baral, E. R.; Kim, J. G. Chemical recycling of poly(bisphenol A carbonate): 1,5,7-Triazabicyclo[4.4.0]-dec-5-ene catalyzed alcoholysis for highly efficient bisphenol A and organic carbonate recovery. *Polymer* **143**, 106-114 (2018).
- (2) Wang, K.-C.; Wang, S.-Y.; Kuo, C.-h.; Tseng, Y. J. Distribution-Based Classification Method for Baseline Correction of Metabolomic 1D Proton Nuclear Magnetic Resonance Spectra. *Analytical Chemistry* **85**, 1231-1239 (2013).
- (3) Lynd, N. A.; Ferrier, R. C., Jr.; Beckingham, B. S. Recommendation for Accurate Experimental Determination of Reactivity Ratios in Chain Copolymerization. *Macromolecules* **52**, 2277-2285 (2019).
- (4) Gillespie, D. T. Exact stochastic simulation of coupled chemical reactions. *The Journal of Physical Chemistry* **81**, 2340-2361 (1977).
- (5) Staggs, J. E. J. Modelling random scission of linear polymers. *Polymer Degradation and Stability* **76**, 37-44 (2002).
